1 **High-throughput characterization of 309 photocrosslinker-bearing ASIC1a**  
2 **variants maps residues critical for channel function and pharmacology**

3

4

5 Nina Braun<sup>1</sup>, Søren Friis<sup>2</sup>, Christian Ihling<sup>3</sup>, Andrea Sinz<sup>3</sup>, Jacob Andersen<sup>1,#</sup>, Stephan A. Pless<sup>1\*</sup>

6

7

8 <sup>1</sup>Department of Drug Design and Pharmacology, University of Copenhagen, Copenhagen, Denmark

9 <sup>2</sup>Nanon Technologies GmbH, Munich, Germany

10 <sup>3</sup>Department of Pharmaceutical Chemistry & Bioanalytics, Institute of Pharmacy, Charles Tanford

11 Protein Center, Martin Luther University Halle-Wittenberg, Halle (Saale), Germany

12 <sup>#</sup>Current address: Lundbeck Research, H. Lundbeck A/S, Valby, Denmark

13

14

15

16

17

18 Short title: High-throughput analysis of ion channels containing non-canonical amino acids

19

20

21

22

23

24

25

26 \* Corresponding Author:

27 Stephan A. Pless: [stephan.pless@sund.ku.dk](mailto:stephan.pless@sund.ku.dk)

28 **Abstract**

29 Incorporation of non-canonical amino acids (ncAAs) can endow proteins with novel functionalities,  
30 such as crosslinking or fluorescence. In ion channels, the function of these variants can be studied  
31 with great precision using standard electrophysiology, but this approach is typically labor intensive  
32 and low throughput. Here, we establish a high-throughput protocol to conduct functional and  
33 pharmacological investigations of ncAA-containing hASIC1a (human acid-sensing ion channel 1a)  
34 variants in transiently transfected mammalian cells. We introduce three different photocrosslinking  
35 ncAAs into 103 positions and assess the function of the resulting 309 variants with automated patch-  
36 clamp (APC). We demonstrate that the approach is efficient and versatile, as it is amenable to  
37 assessing even complex pharmacological modulation by peptides. The data show that the acidic  
38 pocket is a major determinant for current decay and live-cell crosslinking provides insight into the  
39 hASIC1a-psalmotoxin-1 interaction. Overall, this protocol will enable future APC-based studies of  
40 ncAA-containing ion channels in mammalian cells.

41

42

## 43 **Introduction**

44 Genetic code expansion approaches allow the incorporation of non-canonical amino acids (ncAAs)  
45 with unique chemical properties into proteins. Over the past two decades, this method has greatly  
46 facilitated protein modification and functionalization beyond the confines of the genetic code [1]. Ion  
47 channels have proven highly suited to ncAA incorporation, as evidenced by the success in  
48 introducing photocrosslinking, photoswitchable or fluorescent ncAAs into numerous members of this  
49 large and diverse protein family [2-4]. Among the ncAA subclasses, photocrosslinkers have proven  
50 particularly versatile, as they allow for the trapping of ion channels in certain conformational states  
51 [5-8], capturing of protein-protein interactions [9-12] and covalent linking of receptor-ligand  
52 complexes to delineate ligand binding sites [13-17].

53

54 Typically, incorporation of ncAAs is achieved by repurposing a stop codon to encode for a ncAA  
55 supplied by an orthogonal tRNA/aminoacyl tRNA synthetase (aaRS) pair. But the incorporation  
56 efficiency can be variable and unspecific incorporation of naturally occurring amino acids can result  
57 in inhomogeneous protein populations [2]. Verification of site-specific ncAA incorporation can  
58 therefore be laborious and time-consuming, especially in combination with detailed functional  
59 characterization. As a result, most studies have focused on only a limited number of incorporation  
60 sites, and the evaluation of potential functional or pharmacological effects of ncAA incorporation  
61 often remained minimal. In principle, automated patch-clamp (APC) devices offer fast and efficient  
62 high-throughput testing and have recently gained increasing popularity for electrophysiological  
63 interrogation of a diverse set of ion channels [18-22]. However, a combination of low efficiency of  
64 transient transfection in mammalian cells and limited ncAA incorporation rates have thus far  
65 prevented functional screening of ncAA-containing ion channel variants on APC platforms.

66

67 Here, we sought to overcome these limitations by developing a fluorescence-activated cell sorting  
68 (FACS)-based approach to enrich the population of transiently transfected cells expressing ncAA-  
69 containing ion channels. Using the human acid-sensing ion channel 1a (hASIC1a) as an example,  
70 we incorporated three different ncAA photocrosslinkers (AzF (4-Azido-L-phenylalanine), Bpa (4-  
71 Benzoyl-L-phenylalanine) and Se-AbK ((R)-2-Amino-3-{2-[2-(3-methyl-3H-diazirin-3-yl)-

72 ethoxycarbonylamino]-ethylselanyl)-propionic acid)) at 103 positions throughout its intracellular,  
73 extracellular and transmembrane domains.

74 ASICs are trimeric ligand-gated ion channels that open a weakly sodium-selective pore in response  
75 to proton binding to the so-called acidic pocket and likely other sites in the extracellular domain [23].  
76 Apart from contributions to synaptic plasticity [24, 25], ASICs have recently gained increasing  
77 attention as potential drug targets for pain and stroke [26-35]. The six different human ASIC isoforms  
78 (ASIC1a, 1b, 2a, 2b, 3 and 4) are modulated by an impressive array of neuropeptides and venom-  
79 derived toxins that bind to the large extracellular domain [24, 36, 37]. Intriguingly, the extent and type  
80 of modulation (e.g. inhibition vs potentiation) are often highly dependent on ambient proton  
81 concentration, as well as subtype and species origin [38, 39]. This poses challenges for  
82 pharmacological profiling and motivates a detailed understanding of the mechanism and site of  
83 action of these peptides, to eventually generate lead compounds that could potentially target pain or  
84 stroke.

85

86 In this study, we establish a protocol to functionally screen ncAA-containing ion channels in  
87 transiently transfected cells on an APC platform. The 384-well setup of the SyncroPatch 384PE  
88 (Nanon Technologies) allows the efficient characterization of 309 hASIC1a variants and we show  
89 that ncAA incorporation is tolerated in over 50% of the positions. Incorporation of bulky ncAA  
90 photocrosslinkers generally results in lower pH sensitivity, especially around the acidic pocket, where  
91 ncAA incorporation also greatly accelerates current decay kinetics. We further demonstrate  
92 differential channel modulation by the neuropeptide big dynorphin (BigDyn; [40]) and by psalmotoxin-  
93 1 (PcTx1; [41]), a toxin derived from tarantula venom. Lastly, we turn to UV-induced  
94 photocrosslinking to covalently trap channel-toxin complexes and thus map the hASIC1a-PcTx1  
95 interaction in live cells. Overall, our work highlights that ncAA-containing ion channels, including  
96 ASICs, ionotropic glutamate and P2X receptors, are amenable to APC-based high-throughput  
97 screening. We further demonstrate how this approach, when used with ncAA photocrosslinkers, can  
98 be harnessed to investigate protein-peptide or protein-protein interactions *in cellulo*.

## 99 **Results**

### 100 **Development of an APC screen to validate ncAA incorporation into hASIC1a**

101 In order to efficiently assess functional incorporation of ncAAs into human ASIC1a (hASIC1a), we  
102 developed an APC screen to record proton-gated channel activation (Figure 1). To this end, we co-  
103 transfected 103 different hASIC1a variants containing individual TAG stop codons throughout the  
104 protein together with the suppressor tRNA/ncAA-RS pair for either AzF, Bpa or Se-AbK and a GFP-  
105 reporter carrying a TAG at Y40 (for Bpa and Se-AbK) or Y151 (for AzF, as we observed a higher  
106 degree of unspecific incorporation in the Y40TAG variant with AzF) into custom-made ASIC1a-KO  
107 HEK 293T cells [17, 42-44]. The corresponding ncAA was supplied in the cell culture medium six  
108 hours after transfection or omitted from the experiment in incorporation control samples. To increase  
109 cell viability and uptake efficiency, we synthesized the methylester derivates of AzF and Bpa [8, 45].  
110 This allowed us to supplement the cell media with 50- and 100-fold lower ncAA concentration  
111 compared to previous studies, respectively [7, 13].

112 After 48 hours, cells grown in the presence of ncAA were sorted for green fluorescence to enrich the  
113 population of transfected cells, which were then submitted to APC to record proton-gated currents.  
114 Using GFP fluorescence as a proxy, we determined a transfection efficiency of  $62.9 \pm 9.5\%$  for  
115 hASIC1a WT and an average of  $11.2 \pm 5\%$  for the ncAA variants (Figure S1, Table S1). Without the  
116 FACS step, the latter rate would translate into less than 10% of the APC wells being occupied by  
117 transfected cells, precluding efficient APC experiments. By contrast, the cell sorting improves  
118 occupation to around 46% of wells with successful patch also displaying proton-gated currents (62%  
119 for AzF, 29% for Bpa and 48% for Se-AbK) and is therefore an indispensable element for the use of  
120 transiently transfected cells in APC (Figure S1).

121 The 384-well system of the SyncroPatch 384PE allows for parallel concentration response curve  
122 measurements on 24 different samples, enabling us to test 11 different channel variants with  
123 corresponding incorporation controls (cells grown in the absence of ncAA), as well as hASIC1a WT  
124 and untransfected cells in less than one hour, with up to 16 replicates per sample. Specifically, we  
125 embarked to functionally interrogate 103 positions throughout the hASIC1a sequence: 38 positions  
126 in the N-terminal domain (Figure S2), 24 positions in the transmembrane domain and interface

127 region (Figure S3), 29 positions in the C-terminal domain (Figure S4) and 12 positions around the  
128 acidic pocket (Figure 3 and S8). The current traces in Figure 2A show typical pH-induced inward  
129 currents of hASIC1a WT with a  $\text{pH}_{50}$  of  $6.64 \pm 0.12$  ( $n=182$ ), in line with previous studies [46, 47], as  
130 well as a variant with lower proton sensitivity containing AzF in the acidic pocket (T236AzF,  $\text{pH}_{50}$   
131  $6.17 \pm 0.14$ ,  $n=10$ ). Interestingly, the incorporation of Bpa, AzF and Se-AbK at position W46 did not  
132 result in proton-gated currents (Figure 2A, Figure S3), despite a previous report showing functional  
133 incorporation of a bulky ncAA at this conserved Trp in the M1 helix [48]. We analysed all variants for  
134 mean peak current size and  $\text{pH}_{50}$  to compare incorporation efficiency and proton sensitivity,  
135 respectively (Figures S2-4 and S8, Table S1). Furthermore, we routinely assessed the extent of  
136 tachyphylaxis [49] and variants displaying >20% current decrease after reaching the peak current  
137 are indicated in Figures 3 and S2-8 as well as Table S1.

138 To provide a comprehensive overview, we mapped incorporation patterns for the three  
139 photocrosslinkers onto snake plots schematically depicting an ASIC1a subunit (Figure 2B-D). We  
140 defined specific incorporation (circles with dark colour shade) as proton-gated currents of >1 nA  
141 observed in the presence of ncAA, and minimal (<500 pA) proton-gated currents in the absence of  
142 ncAA. If currents >500 pA were observed in the absence of ncAA, incorporation was considered  
143 unspecific (circles with lighter colour shade), while positions labelled in grey did not yield substantial  
144 currents in either condition (<1 nA). However, we cannot exclude the possibility of underestimating  
145 the degree of unspecific incorporation, as enriching transfected cells grown in the absence of ncAA  
146 by FACS was not feasible due to the low number of cells displaying GFP fluorescence ( $2.2 \pm 1.7\%$ ).  
147 On the other hand, by defining incorporation as not successful for currents <1 nA, we are aware that  
148 we may have potentially excluded variants in which specific ncAA incorporation resulted in reduced  
149 open probability or lower conductance.

150 As is apparent from the snake plots, we observed robust incorporation in the N-terminus, around the  
151 acidic pocket and in the proximal C-terminus. Indeed, among the 80 positions tested up to and  
152 including L465, AzF resulted in functional channel variants in 61% of cases, compared to 50% for  
153 Bpa and 44% for Se-AbK (Figure 2E).

154

155

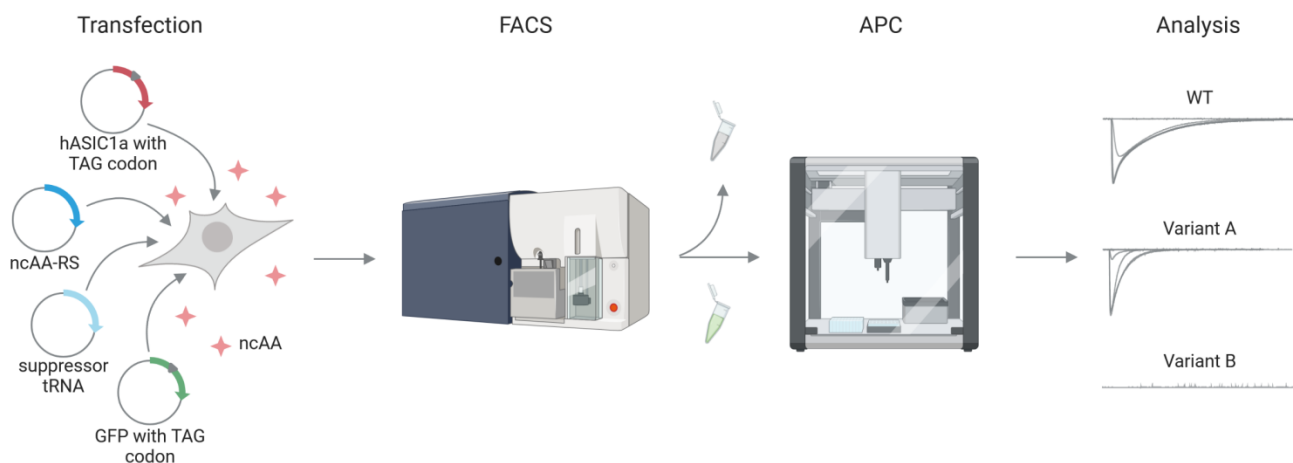

156

157 *Figure 1: Schematic illustration of the workflow to assess ncAA incorporation into hASIC1a.*  
158 *HEK 293T ASIC1a-KO cells are transfected with hASIC1a containing a TAG stop codon at the site*  
159 *of interest, a co-evolved suppressor tRNA/ncAA-RS pair and a TAG-containing GFP reporter. ncAA*  
160 *is supplied in the cell culture medium. 48 hours after transfection, cells are sorted for green*  
161 *fluorescence on a FACS BD Aria I and those showing fluorescence are subjected to APC on a*  
162 *SyncroPatch 384PE to measure proton concentration response curves.*

163

164 By contrast, all three crosslinkers showed mostly unspecific incorporation distal of L465, with WT-  
165 like current phenotypes from position 467 onwards (Figure S4 and S5A-C). This led us to  
166 hypothesize that channel constructs truncated in this region are functional. To investigate this further,  
167 we inserted an additional TGA stop codon for several variants, confirmed channel truncation by  
168 comparing molecular weight on a Western blot and measured concentration response curves in APC  
169 and two electrode voltage-clamp (TEVC) (Figure S5D-E). We found that channels truncated after  
170 H463 or K464 yielded no current in either APC or TEVC, but truncation after L465 produced a variant  
171 with strong tachyphylaxis in HEK 293T cells (Figure S5D) and truncation after C466 or R467 resulted  
172 in channels with WT-like proton sensitivity in both APC and TEVC. We conclude that the C-terminus  
173 distal of position 465 is not essential for proton-gated channel activity and that it is not possible to  
174 differentiate between currents originating from truncated and full-length protein to evaluate ncAA  
175 incorporation. We therefore added a C-terminal 1D4-tag to the hASIC1a construct to selectively  
176 purify full-length protein and compare the amounts in cells grown in the presence or absence of  
177 ncAA. This strategy confirms efficient incorporation in the distal C-terminus (Figure S6A).

178 Additionally, liquid chromatography/tandem mass spectrometry data revealed that Bpa can be  
179 specifically incorporated at positions distal of L465 (A480, Figure S6B).

180 For the 80 positions up to and including L465, we evaluated incorporation efficiency by comparing  
181 how many positions could be functionally replaced by each of the ncAA photocrosslinkers, based on  
182 the nature of the side chain occupying the position in the native channel and the position within the  
183 protein overall. We did not find evidence for pronounced global trends, but for instance Bpa  
184 incorporation was tolerated best at originally aromatic side chains (79%), while replacement of basic  
185 residues was least successful (27%) (Figure 2E). The three tested prolines could not be exchanged  
186 for any of the ncAAs. Interestingly, and in contrast to our expectations, Se-AbK incorporation only  
187 produced functional variants in 33% of cases when replacing structurally similar Lys and Arg side  
188 chains, while success rates were higher at polar and acidic side chains (58% and 54%, respectively).  
189 AzF incorporation rates were similar throughout all protein domains, whereas Bpa was better  
190 tolerated in the transmembrane regions and less in the N- and C-termini and Se-AbK incorporation  
191 in the M2 helix and C-terminus was negligible (Figure 2E). Overall, incorporating the three  
192 photocrosslinkers produced functional variants in all protein domains, albeit with varying success  
193 rates.

194 Together, we show that combining FACS with APC affords the time-efficient functional  
195 characterization of over 300 hASIC1a variants and provides a versatile platform to assess successful  
196 ncAA incorporation throughout all protein domains.

197 To evaluate if the established APC screen can also serve as a platform for other ion channels, we  
198 applied it to selected TAG variants of the rat P2X2 and rat GluA2 receptors. Specifically, we  
199 compared currents upon exposure to two different concentrations of ATP or glutamate, respectively  
200 (Figure S7 and Table S2, [5, 7, 50]). Incorporation of AzF into position K296 of the rP2X2 receptor  
201 is unspecific, whereas that of Bpa is efficient and specific (Figure S7A). For GluA2, incorporation  
202 patterns at Y533 and S729 are identical to those observed in previous studies using manual patch-  
203 clamp (Figure S7B, [5, 7]). Incorporation of AzF at Y533 is tolerated with currents of  $1.21 \pm 0.96$  nA  
204 ( $n=30$ , compared to  $600 \pm 100$  pA ( $n=15$ ) reported by Poulsen *et al.*), while incorporation of Bpa does  
205 not produce a functional channel. At position S729, we observe small currents of  $390 \pm 330$  pA for  
206 AzF ( $n=17$ ) and  $280 \pm 240$  pA for Bpa ( $n=16$ , compared to  $470 \pm 50$  pA reported by Klippenstein *et*



207 *al.* for S729Bpa). Importantly, as GluA2 gating is fast compared to the perfusion speed of the  
208 SyncroPatch 384PE and Klippenstein *et al.* report increased desensitization rates for S729 variants,  
209 we pre-incubated cells with 100  $\mu$ M cyclothiazide to slow desensitization and increase the likelihood  
210 of resolving the GluA2 peak current [51]. While our GluA2 and P2X2 data show that target-specific  
211 optimization of the ligand-application protocols is required, they illustrate that our APC screening  
212 approach can be applied to a variety of different ion channels and yields results comparable to those  
213 obtained with conventional ncAA-incorporation protocols.

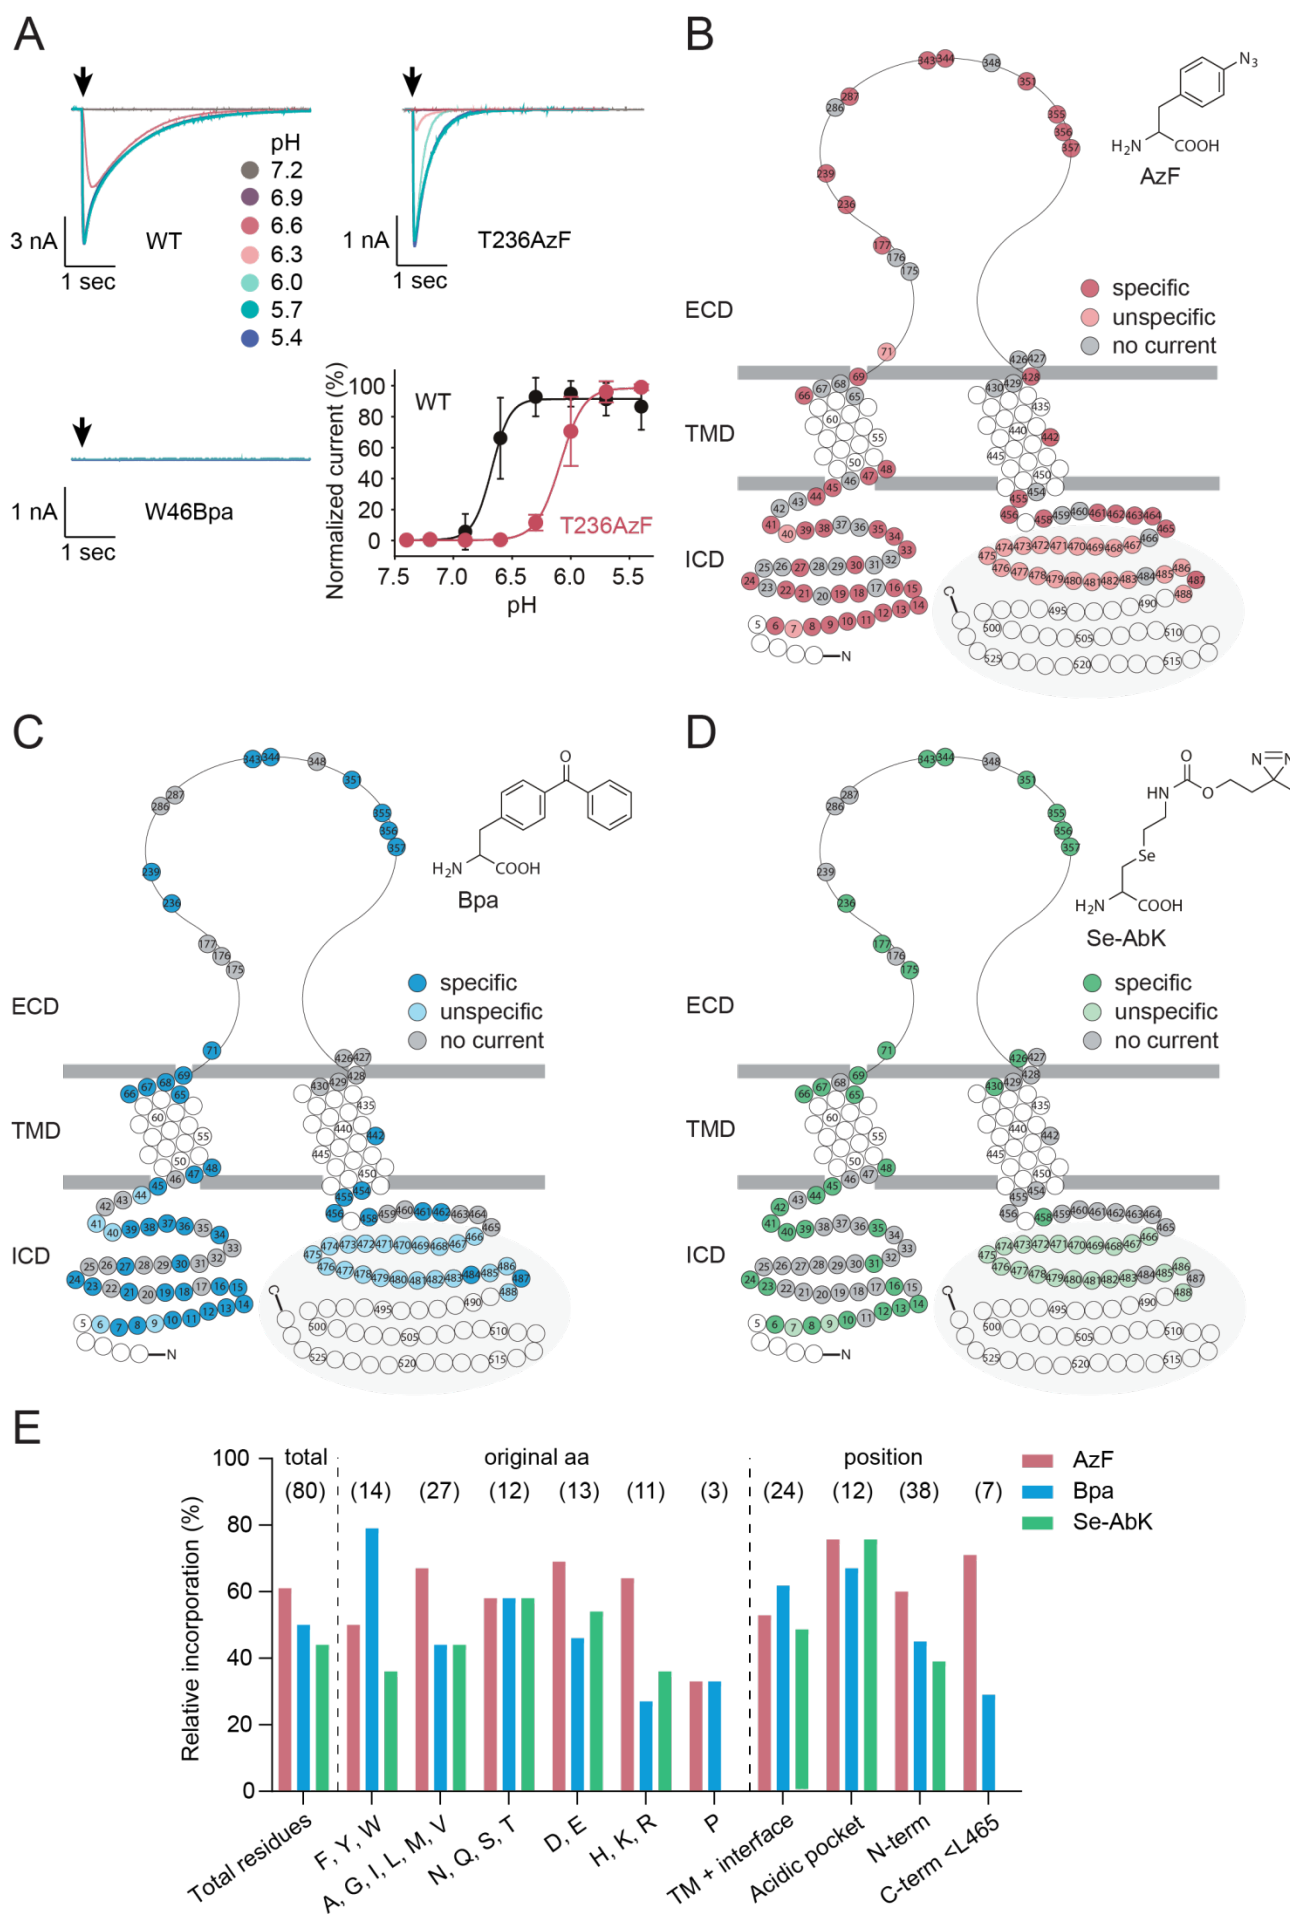

215 *Figure 2: Incorporation of ncAA crosslinkers is tolerated in all domains of hASIC1a and produces*  
216 *functional channel variants. (A) Representative current traces for pH response curves of hASIC1a*  
217 *WT, T236AzF and W46Bpa recorded on the SyncroPatch 384PE, pH response curve in bottom right*  
218 *corner (WT  $pH_{50}$   $6.64 \pm 0.12$ ,  $n=182$ ; T236AzF  $pH_{50}$   $6.17 \pm 0.14$ ,  $n=10$ ). (B-D) Snake plot*  
219 *representations indicating specific, unspecific and unsuccessful incorporation (no current) for AzF*  
220 *(B), Bpa (C) and Se-AbK (D). Specific incorporation (circles with darker shade) is defined as pH-*  
221 *dependent peak currents  $>1$  nA observed in cells grown in the presence, but not in the absence of*  
222 *ncAA, whereas unspecific incorporation (circles with lighter shade) indicates that currents were*  
223 *observed both in the presence and absence of ncAA. Positions indicated by grey circles did not yield*  
224 *functional channel variants when replaced by an ncAA (no current), while those coloured in white*  
225 *were not tested. The grey area highlights positions distal of L465. (E) Relative incorporation rates of*  
226 *AzF (red), Bpa (blue) and Se-AbK (green) at 80 different hASIC1a positions. Exchanged amino acids*  
227 *are grouped for original side chain properties and position within the channel, respectively (TM:*  
228 *transmembrane helices; N-term: N-terminus; C-term  $<L465$ : C-terminus up to and including L465).*  
229 *Relative incorporation rates were calculated by dividing the number of positions successfully*  
230 *replaced with a ncAA by the total number of positions at which incorporation was attempted.*  
231 *Positions distal of L465 were excluded from the analysis (highlighted in grey in B-D), as more distal*  
232 *deletions result in truncated, but functional channels (see Figures S4-6).*

### 233 **Photocrosslinker incorporation in the acidic pocket decreases proton sensitivity and** 234 **accelerates current decay**

235 During the design of the construct library for the APC screen, we consulted the 2.8 Å resolution  
236 structure of PcTx1 bound to chicken ASIC1 (PDB 4FZ0) to select 12 positions around the acidic  
237 pocket that are in sufficiently close proximity to potentially form covalent crosslinks with PcTx1 if  
238 replaced by a ncAA [52] (Figure S8A). Most of the resulting ncAA channel variants were functional,  
239 but in several instances, the initially applied proton concentration range of up to pH 5.4 did not yield  
240 saturating currents (Figure S8B/C). Consequently, we re-evaluated these variants using a lower pH  
241 range to resolve the  $pH_{50}$  and re-assess peak current size (Figure 3). This allowed us to determine  
242  $EC_{50}$  values for all variants and confirmed that hASIC1a variants containing ncAAs in the acidic  
243 pocket display markedly reduced proton sensitivity, with  $pH_{50}$  values as low as  $5.49 \pm 0.13$   
244 (T239Bpa, mean  $\pm$  S.D.,  $n=6$ ) and  $5.66 \pm 0.26$  (D357AzF, mean  $\pm$  S.D.,  $n=10$ ). Additionally, we  
245 observed substantial changes in current shape compared to WT. For example, current decay rates  
246 were increased for T239Bpa ( $t_{1/2}$   $224 \pm 176$  ms,  $n=6$ ) and D357AzF ( $t_{1/2}$   $93.8 \pm 40.9$  ms,  $n=10$ )

247 compared to WT ( $t_{1/2}$  818  $\pm$  750 ms, n=9), indicating possible effects of the photocrosslinkers on  
 248 channel gating (rates of desensitization or closure, Figure 3B and Table S3). Overall, we found that  
 249 incorporation of Se-AbK was least efficient, so all subsequent experiments focused on AzF- and  
 250 Bpa-containing channel variants.

251 As hASIC1a variants with ncAAs around the acidic pocket displayed markedly altered proton  
 252 sensitivity and current decay rates, we next wanted to assess if these variants can still be modulated  
 253 by two peptide gating modifiers that interact with the acidic pocket, BigDyn and PcTx1.

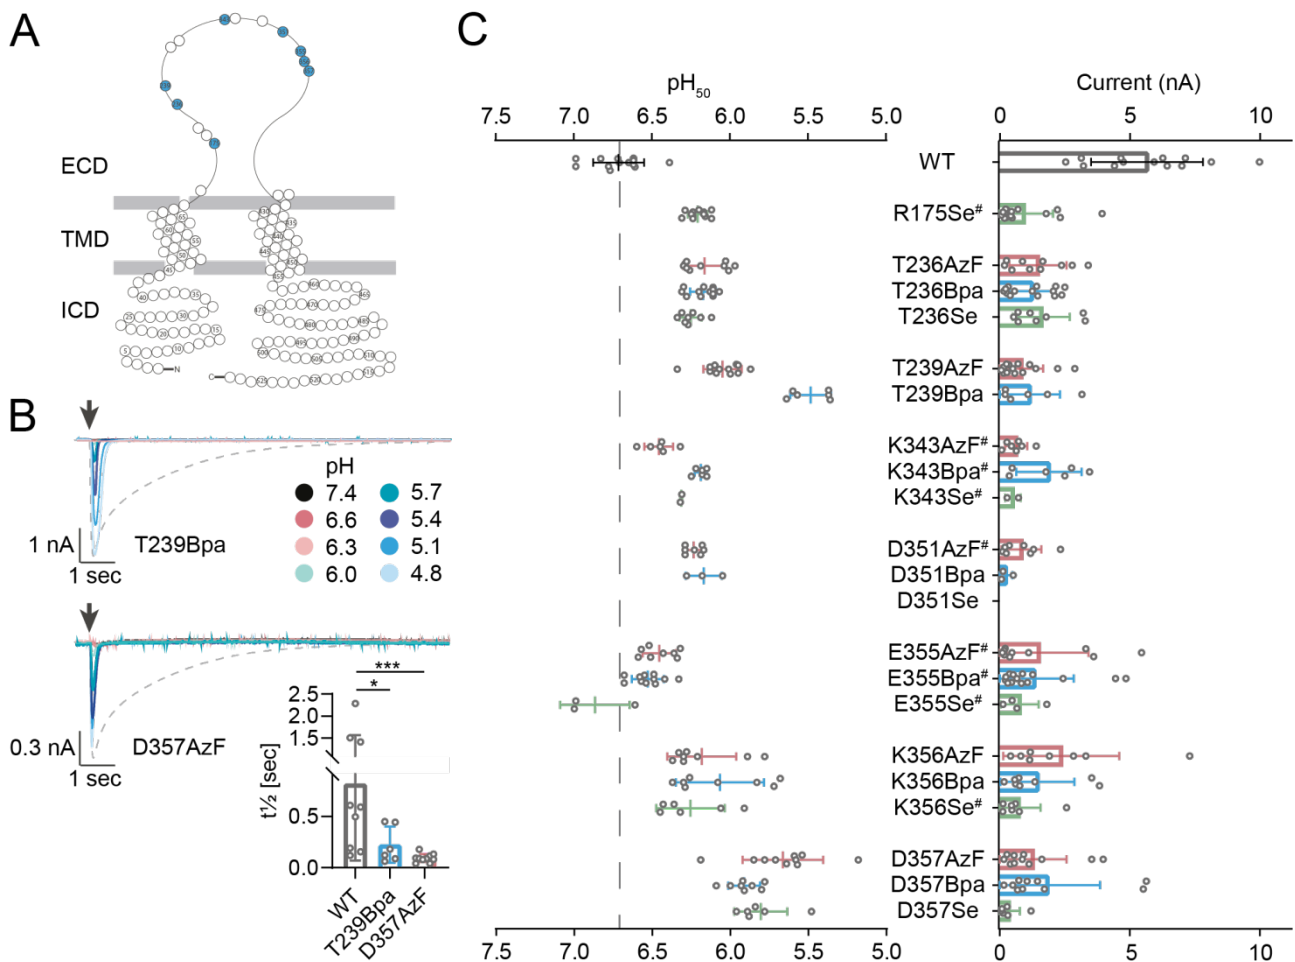

254

255 *Figure 3: Incorporation of ncAA photocrosslinkers into the acidic pocket results in channel variants*  
 256 *with lowered proton sensitivity and accelerated current decay. (A) Snake plot of hASIC1a with the*  
 257 *assessed positions highlighted in blue. (B) Representative current traces of variants T239Bpa and*  
 258 *D357AzF as recorded on the SyncroPatch 384PE, with arrows indicating the time of proton*  
 259 *application. Dashed lines indicate WT current in response to pH 6.0 application. Bar graph shows*  
 260 *mean  $t_{1/2}$   $\pm$  S.D. of current decay. (C) Incorporation of AzF (red), Bpa (blue) and Se-AbK (green)*  
 261 *at 8 positions around the acidic pocket results in lowered proton sensitivity for several variants. Dot*  
 262 *plots comparing  $pH_{50}$  (left) and peak current sizes (right), bars indicate mean  $\pm$  S.D., (#) indicates*

263 >20% tachyphylaxis (see also Figure S8 and Table S1), (\*) denotes significant difference between  
264  $t\frac{1}{2}$  of current decay,  $p < 0.05$ ; (\*\*\*):  $p < 0.001$ ; Mann-Whitney test (see also Table S3).

## 265 **Peptide modulation is retained in hASIC1a variants containing photocrosslinkers in the** 266 **acidic pocket**

267 First, we investigated the neuropeptide BigDyn, which interacts with the acidic pocket and shifts the  
268 proton dependence of both activation and SSD [17]. A key physiological function of BigDyn is to limit  
269 ASIC1a steady-state desensitization (SSD) [40]. In order to define the appropriate pH for BigDyn  
270 application on each variant, we first established an APC-based protocol to determine SSD curves.  
271 Due to the open-well system of the SyncroPatch 384PE, lowering the conditioning pH to assess SSD  
272 required multiple mixing steps, which we simulated on a pH meter to determine the apparent pH the  
273 cells are exposed to before each activation (Figure S9). Using this approach, we obtained a  $pH_{50}$   
274 SSD of  $6.91 \pm 0.02$  for hASIC1a WT ( $n=40$ ), which is lower than the value reported in *Xenopus laevis*  
275 oocytes ( $pH_{50}$  SSD =  $7.05 \pm 0.01$ , Figure S10A+B). Notably, we also observed a more shallow Hill  
276 slope for WT compared to oocytes ( $n_H$   $3.16 \pm 0.42$  vs  $9.45 \pm 2.84$ ), but not for any of the tested  
277 variants in the acidic pocket or interface region (Figure S10B-F, Table S4). SSD profiles of the ncAA-  
278 containing variants varied with  $pH_{50}$  SSD values ranging from  $7.15 \pm 0.01$  (E177Bpa,  $n=12$ ) to  $6.76$   
279  $\pm 0.06$  (K356AzF,  $n=7$ , Table S4), with most variants displaying a slightly increased proton sensitivity  
280 compared to WT. This is in contrast to the observed pattern of reduced proton sensitivity for proton-  
281 gated activation, suggesting that incorporation of ncAA photocrosslinkers in the acidic pocket  
282 modulates proton sensitivity of activation and SSD differentially. For our subsequent APC  
283 experiments to assess BigDyn modulation, we chose a conditioning pH that led to around 10%  
284 remaining current upon activation.

285 Here, we focused on AzF-containing variants for which we had previously detected crosslinking to  
286 BigDyn on Western blots to evaluate if the observed peptide-channel interaction also results in  
287 functional modulation [17]. Cells were exposed to SSD-inducing pH conditions in the presence or  
288 absence of 3  $\mu$ M BigDyn and the resulting currents upon pH 5.6 activation were normalized to control  
289 currents after incubation at pH 7.6 (Figure 4A+B). Control cells not exposed to BigDyn exhibited SSD  
290 to 0-30% mean remaining current (Figure S11, Table S5), while BigDyn co-application during

291 conditioning limited SSD to varying degrees (Figure 4B). BigDyn increased rescue from pH-induced  
 292 SSD in all tested AzF-containing variants, but did not do so in WT, despite a similar trend (Figure 4B).  
 293 For all tested variants, we regularly observed incomplete SSD after the first conditioning step, but  
 294 this typically increased after the second conditioning step (see Figure S11). This could point towards  
 295 possible confounding effects by the repeated solution mixing to achieve the desired conditioning pH  
 296 described above. However, despite the reduced control over the conditioning pH compared to using  
 297 a perfusion system with continuous flow, it was still possible to determine if BigDyn modulates  
 298 hASIC1a SSD. In short, the APC setup enables rapid evaluation of several channel variants with  
 299 different SSD profiles for BigDyn modulation in a single experiment.  
 300

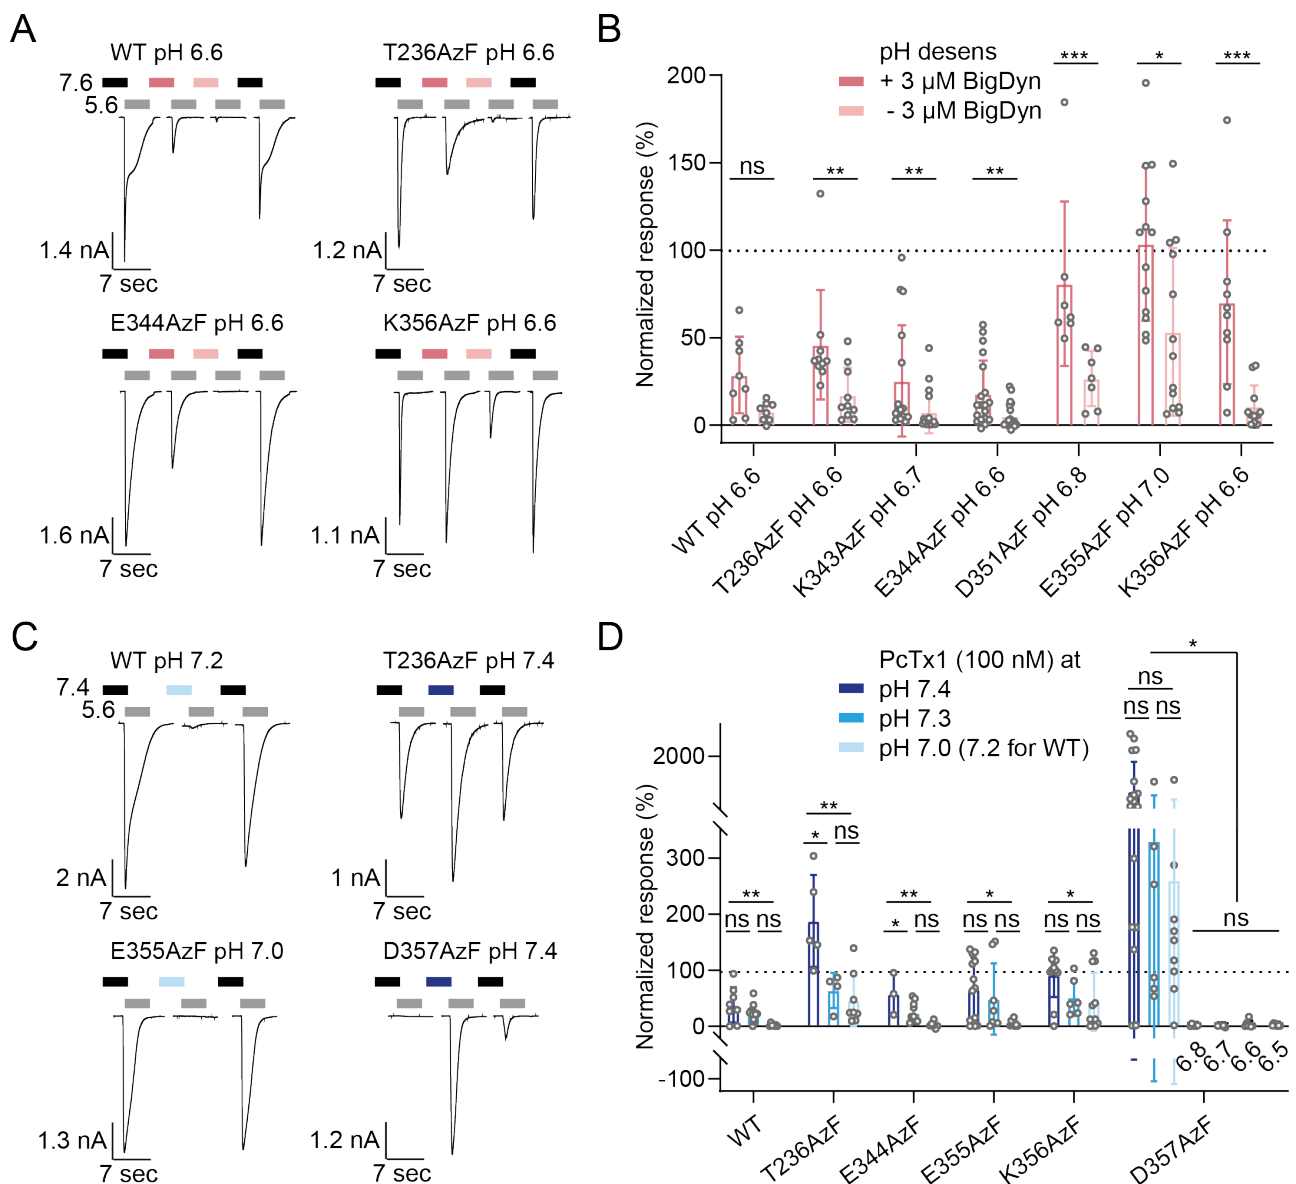

301

302 *Figure 4: Peptide modulation of hASIC1a WT and selected variants containing AzF in the acidic*  
303 *pocket. (A) Characteristic current traces and (B) normalized response after SSD in absence or*  
304 *presence of BigDyn for hASIC1a WT and six ncAA variants. Cells were incubated at the*  
305 *desensitizing pH specified for each variant with or without 3  $\mu$ M BigDyn for 2 min (pink bars) before*  
306 *activation at pH 5.6 (grey bars, 5 sec) and the currents were normalized to the average of two control*  
307 *currents after conditioning at pH 7.6 (black bars; control traces shown in Figure S11). (C) Exemplary*  
308 *current traces and (D) bar graph for PcTx1 modulation of hASIC1a WT and selected variants*  
309 *containing AzF in the acidic pocket at different pH. Cells were incubated with 100 nM PcTx1 at*  
310 *varying pH for 2 min (blue bars) before activation at pH 5.6 (grey bars, 5 sec) and the current was*  
311 *normalized to the average of the four preceding and following control currents after conditioning at*  
312 *pH 7.4 (black bars). Bar graphs show mean  $\pm$  S.D, dashed line indicates 100%, values in Table S5*  
313 *and S6. (\*) denotes significant difference between groups,  $p < 0.05$ ; (\*\*):  $p < 0.01$ ; (\*\*\*):  $p < 0.001$ ;*  
314 *ns: not significant; Mann Whitney test (B) or one-way ANOVA with Tukey's multiple comparisons*  
315 *test (D). Coloured and black bars in (A) and (C) not to scale.*

316

317 We next tested a subset of AzF-containing acidic pocket variants for modulation by the gating  
318 modifier PcTx1, which was originally isolated from the venom of the *Psalmopoeus cambridgei*  
319 tarantula [41]. PcTx1 has previously been shown to increase the apparent proton affinity of both  
320 activation and steady-state desensitization of ASIC1a, resulting in inhibition or potentiation,  
321 depending on the application pH [39, 41, 53, 54]. Here, we assessed hASIC1a modulation by co-  
322 applying 100 nM PcTx1 at varying conditioning pH and compared the resulting current upon  
323 activation with pH 5.6 to the average of the preceding and following control currents after  
324 conditioning at pH 7.4 (Figure 4C). For hASIC1a WT, we observed increasing inhibition from  
325  $38.2 \pm 31.7\%$  of current remaining at pH 7.4 to  $2.06 \pm 2.50\%$  at pH 7.2 (Figure 4D, Table S6). This  
326 is in agreement with previous findings that the PcTx1  $IC_{50}$  decreases at lower pH values [39].  
327 Channel variants with AzF in positions 344, 355 or 356 showed a similar trend (Figure 4D). In  
328 contrast, we saw potentiation for T236AzF at pH 7.4 and for D357AzF at pH 7.4 to 7.0 (Figure 4C+D).  
329 This is consistent with the observation that these variants are among those with most pronounced  
330 reduction in the  $pH_{50}$  of activation (Figure 3, S8 and Table S1,  $pH_{50}$   $6.17 \pm 0.14$  (n=10) and  
331  $5.66 \pm 0.26$  (n=10), respectively). D357AzF in particular exhibited an unusual phenotype: the first  
332 two control applications of pH 5.6 led to only very small or no detectable channel activation, but pH  
333 5.6 after pre-application of the toxin induced a substantial inward current, after which the channels  
334 also activated in response to the following control applications. We therefore chose to evaluate

335 PcTx1 modulation of D357AzF in more detail. Specifically, we used lower pH during conditioning  
336 and observed that at pH 6.8 and below, the variant is inhibited. In light of the strong potentiation at  
337 pH 7.0, this highlights that PcTx1 modulation of D357AzF exhibits a striking pH dependence, which  
338 far exceeds that of WT and the other mutants examined here (Figure 4D, Table S6) [39].

339 Overall, the APC assay established here enabled the time-efficient characterization of  
340 pharmacological modulation of selected hASIC1a variants, providing an overview on their PcTx1  
341 modulation profile at different application pH. Together, these results confirm that hASIC1a variants  
342 containing ncAA photocrosslinkers in the acidic pocket can still be modulated by known peptide  
343 gating modifiers, opening avenues to efficiently study peptide-channel interactions with a  
344 combination of APC and photocrosslinking.

#### 345 **Photocrosslinking confirms PcTx1 binding to the hASIC1a acidic pocket**

346 Nine out of the originally targeted 12 positions around the PcTx1 binding site exhibited specific AzF  
347 incorporation (Figure 5A, left inset) and were used for photocrosslinking experiments followed by  
348 Western blotting following the workflow in Figure 5B. In parallel, six positions in the lower  
349 extracellular domain, F69, Y71, V80, D253, W287 and E413 were also replaced by AzF to confirm  
350 the specificity of potential photocrosslinking around the acidic pocket. (Figure 5A, right insets).  
351 hASIC1a variants were expressed in HEK293T ASIC-KO cells and 100 nM biotinylated PcTx1 was  
352 added before cells were exposed to UV light (365 nm) for 15 min to induce photocrosslinking. We  
353 then isolated full-length hASIC1a via a C-terminal 1D4-tag and analysed protein samples on a  
354 Western blot with antibodies against biotin and the 1D4-tag to detect PcTx1 and hASIC1a,  
355 respectively. Biotinylated PcTx1 was absent in UV-exposed hASIC1a WT and in all control positions  
356 containing AzF in the lower extracellular domain (F69, Y71, V80, D253, W287 and E413), as well as  
357 in samples containing AzF in the acidic pocket not exposed to UV light (Figure 5C). By contrast,  
358 PcTx1 was detected at four out of nine AzF-containing positions (344, 355, 356 and 357) after UV  
359 exposure, indicating covalent photocrosslinking at these positions (marked in red in Figure 5A), but  
360 at none of the five other sites in the acidic pocket tested (marked in green).

361



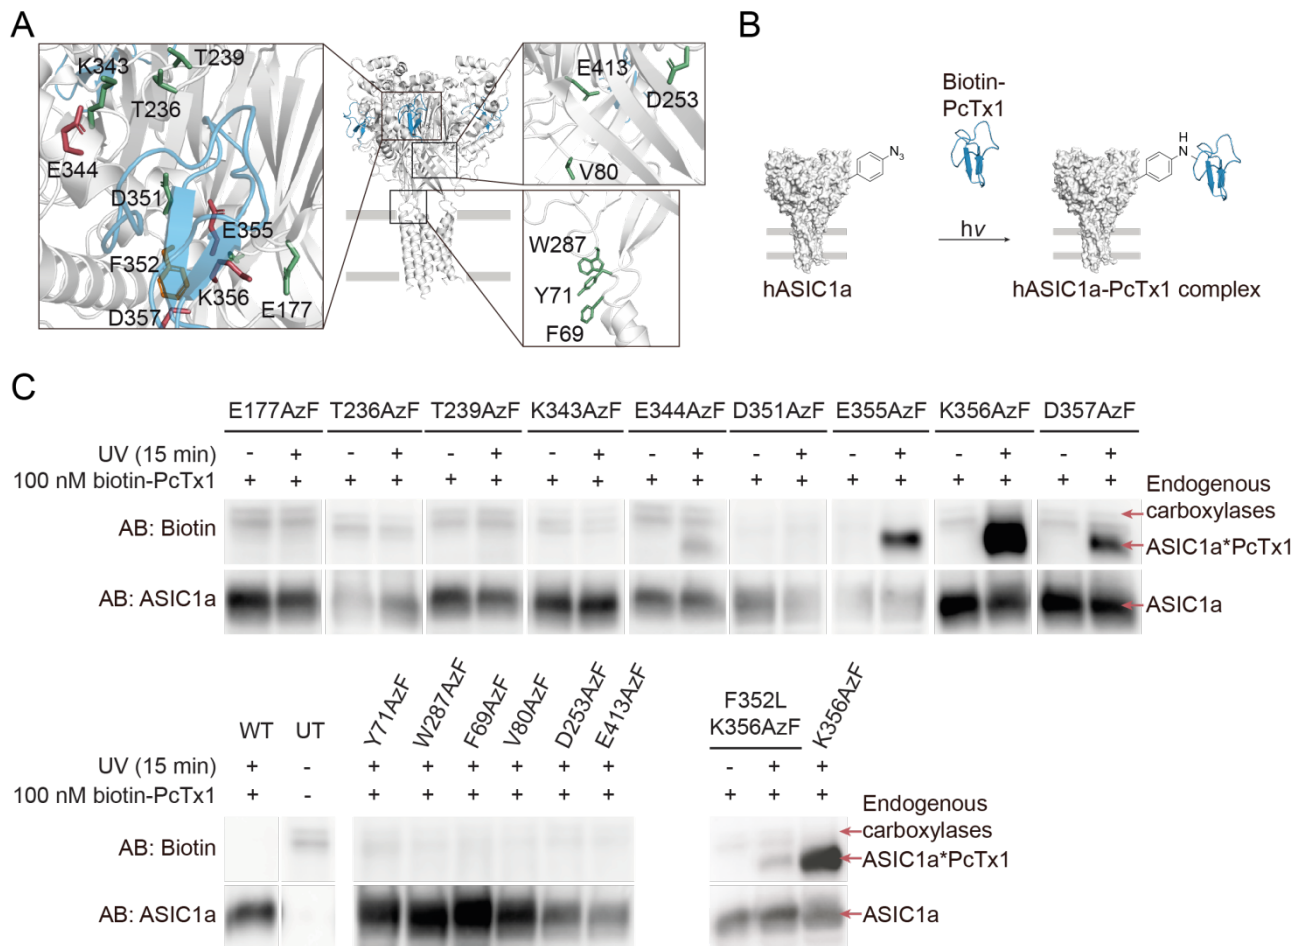

362

363 *Figure 5: Live-cell photocrosslinking delineates the PcTx1 binding site at the ASIC1a acidic pocket.*  
 364 (A) Structure of cASIC1 (white) in complex with PcTx1 (blue, PDB: 4FZ0), insets show individual  
 365 side chains replaced by AzF in the acidic pocket (left inset) and lower extracellular domain (right  
 366 insets). Positions that crosslinked to biotin-PcTx1 are coloured red, F352 is marked in orange and  
 367 positions that did not crosslink are coloured green. (B) Schematic workflow for crosslinking to biotin-  
 368 PcTx1. HEK 293T ASIC1a-KO cells expressing AzF-containing hASIC1a variants are incubated with  
 369 100 nM biotin-PcTx1 and exposed to UV light for 15 min to form covalent hASIC1a-PcTx1  
 370 complexes, which are purified via a C-terminal 1D4-tag on hASIC1a and visualized via Western  
 371 blotting. (C) Western blot of purified hASIC1a WT, untransfected cells (UT) and variants carrying  
 372 AzF in the extracellular domain detected using the specified antibodies (AB). Biotin-PcTx1 is  
 373 detected in UV-exposed samples containing AzF at positions 344, 355, 356 and 357 in the acidic  
 374 pocket (coloured red in A, left inset), but not at positions 177, 236, 239, 343 or 351 (coloured green  
 375 in A, left inset). PcTx1 is also absent in control samples not exposed to UV, those carrying AzF in  
 376 the lower extracellular domain (right insets in A), WT or UTs. PcTx1 can be detected upon UV-  
 377 exposing the toxin-insensitive F352L K356AzF double mutant (left inset in A, F352 coloured orange).  
 378 Of note, the anti-biotin AB detects endogenous biotin-dependent carboxylases, which are also found  
 379 in purified samples from UTs and have been described before [55, 56]. Data is representative of

380 *three individual experiments, see Figures S12-15 for original blots and crosslinking attempts with*  
381 *Bpa.*

382

383 Previous studies have shown that the F352L mutation at the base of the acidic pocket eliminates the  
384 modulatory effect of PcTx1 on hASIC1a [57, 58], but it remained unclear if the toxin is still able to  
385 bind to hASIC1a. To test this possibility directly, we combined the F352L mutation with one of the  
386 crosslinking variants, resulting in the hASIC1a F352L K356AzF double mutant variant. Upon UV  
387 exposure, we were able to detect the PcTx1-hASIC1a complex even in the presence of the F352L  
388 mutation, albeit in lower amounts as assessed by the lower band intensity compared to the K356AzF  
389 single variant (Figure 5C, lower panel). This suggests that the F352L mutation does not eliminate  
390 toxin binding *per se*, but likely primarily abolishes the functional effects caused by PcTx1.

391 Attempts to photocrosslink PcTx1 using Bpa in the equivalent positions around the acidic pocket did  
392 not succeed (Figure S12). We therefore tested PcTx1 modulation of selected Bpa variants on the  
393 SyncroPatch 384PE to assess if the toxin binds to the acidic pocket when Bpa is present (Figure  
394 S13, Table S6). We observed robust inhibition at pH 7.0, indicating the interaction persists despite  
395 incorporating a bulky ncAA within the acidic pocket. However, most of the variants showed only weak  
396 modulation at the pH used during the UV exposure (7.4), which might partly explain the lack of  
397 crosslinking with Bpa.

398 Overall, our photocrosslinking experiments confirm that PcTx1 interacts with the acidic pocket of  
399 hASIC1a, even in the presence of a mutation that abolishes the functional effects of PcTx1.

400

## 401 **Discussion**

### 402 *First comprehensive functional assessment of ncAA-containing ion channels on an APC platform*

403 Since their introduction, APC platforms have greatly aided ion channel research with their high  
404 throughput capabilities [59]. However, the requirement for high transfection rates to express the ion  
405 channels of interest limits the types of experiments that can be performed with this approach. Our  
406 FACS-assisted ncAA incorporation assay represents, to our knowledge, the first example of using  
407 an APC platform to functionally interrogate ncAA-containing ion channels. By transiently transfecting  
408 the protein of interest into mammalian cells and selecting those that express all components with  
409 FACS, we circumvent the need for stable cell lines. This method therefore greatly expands the scope  
410 of experiments that can be addressed using APC-based approaches.

411 Our extensive scanning of 309 ncAA-containing variants emphasizes the amenability of hASIC1a to  
412 ncAA incorporation, with the highest tolerance observed for AzF (61% functional variants) followed  
413 by Bpa (50%) and Se-AbK (44%) (Figure 2E). Previous studies on incorporation of AzF and Bpa into  
414 the human serotonin transporter (hSERT) and  $\alpha$ -amino-3-hydroxy-5-methyl-4-isoxazolepropionic  
415 acid receptor (AMPA) also show preferred functional incorporation of AzF and attribute this to its  
416 smaller size [7, 13]. Rannversson *et al.* report lowest ncAA tolerance in the hSERT TMD (44% and  
417 20% for AzF and Bpa, respectively), contrasting our findings in the TM segments of hASIC1a (52%  
418 and 61%). However, it should be noted that we specifically selected the outer turns of the TM helices,  
419 where the study on AMPARs observed better incorporation compared to the more tightly packed  
420 central pore [7].

421 Previous work on hSERT shows higher success rates for replacing aromatic vs non-aromatic side  
422 chains, a trend we only observe for Bpa. Generally, genetic encoding of nCAAs does not appear to  
423 depend on the original properties of the replaced amino acid when assessed via protein expression  
424 [14, 60]. Indeed, a systematic examination of the effect of the similarly bulky ncAA acridonylalanine  
425 on protein solubility found no correlation to amino acid conservation, hydrophobicity or accessibility,  
426 but a close dependence on the location within the overall tertiary structure [61]. Consequently, the  
427 authors suggest that scientists broaden rather than narrow screens when aiming to introduce a ncAA  
428 into a new target protein. In the present study, we cover around 20% of hASIC1a and functionally

429 assess three different ncAAs, likely the most comprehensive investigation of genetic code expansion  
430 in a transmembrane protein to date.

431

#### 432 *Mechanistic insights into ASIC function*

433 A beneficial side-effect of replacing native side chains with ncAA photocrosslinkers is that, in addition  
434 to their photoactivatable properties, these bulky side chains can also inform on basic biophysical  
435 aspects of the protein domain in question. Here, we show that incorporation of bulky, non-polar side  
436 chains leads to functional channels in about 50% of all cases, and we observe a general trend  
437 towards lower apparent proton affinity in the ncAA-bearing hASIC1a channels. This is particularly  
438 evident at positions in or near the acidic pocket, where previous studies have shown that mutations  
439 to acidic side chains in thumb and finger domains result in increased  $pH_{50}$  values (reviewed in [23]).  
440 By contrast, we only found a few positions in M1 (L45, Q66, F69) that resulted in higher apparent  
441 proton affinity. This is consistent with previous work on the nearby pre-M1 region [62], as well as a  
442 number of M1 and M2 mutations that mostly resulted in left-shifted  $pH_{50}$  values [48, 63]. Together,  
443 this suggests that mutations in M1 and M2 of ASIC1a have a general tendency to increase apparent  
444 proton affinity.

445 Generally, we observe that the time course of current decay is relatively heterogeneous (Figure 2  
446 and 3, S7), likely due to the slow and incomplete solution exchange (see also below). This makes  
447 an exact quantification of the changes to activation or desensitization rates difficult. Nevertheless,  
448 we observe that the same sites around the acidic pocket that show a pronounced decrease in  
449 apparent proton affinity also display a marked acceleration in current decay rates ( $t_{1/2}$  analysis in  
450 Figure 3B, S8 and Table S3). This was consistently observed at all of the eight sites around the  
451 acidic pocket assessed in Figure 3 and was independent of the nature of the incorporated ncAA.  
452 This finding is coherent with a previous study that showed the thumb domain affects rates of fast  
453 desensitization [64]. Alternatively, it is conceivable that the observed phenotype is due to greatly  
454 increased channel deactivation rates [65]. Although we cannot discriminate between these  
455 possibilities, our data clearly show that the physico-chemical properties of side chains lining the  
456 acidic pocket are a major determinant for current decay in ASIC1a.

457 We also noticed varying degrees of tachyphylaxis, especially when positions in the external turns of  
458 the TM helices were replaced with ncAAs (Figure S3, Table S1). In light of previous work suggesting  
459 a contribution by permeating protons and an effect of hydrophobicity of TM1 side chains on  
460 tachyphylaxis, this warrants further investigation [49, 66].

461

#### 462 *Complex pharmacological modulation studied in ncAA-containing channels using APC*

463 The complex pharmacological modulation pattern of hASIC1a by BigDyn and PcTx1 is notoriously  
464 challenging to study. However, we were able to optimize the APC protocols to replicate and even  
465 expand on the differential effects of this highly state-dependent peptide modulation (Figure 4).  
466 Specifically, we were able to show that despite the prominently lowered proton sensitivity of acidic  
467 pocket variants, all tested ncAA-containing hASIC1a variants retained some degree of modulation  
468 by both BigDyn and PcTx1. We observed varying degrees of BigDyn-dependent rescue from SSD  
469 for the different variants (Figure 4B). Under our conditions, rescue from SSD was incomplete when  
470 we applied 3  $\mu$ M BigDyn, a concentration well above the reported EC<sub>50</sub> range of 26-210 nM [17, 40].  
471 In combination with the steep pH dependence of modulation, this resulted in considerable variability  
472 in the BigDyn modulation data, as evident by the reported range in S.D. values. While this can, at  
473 least in part, be attributed to our limited control over the BigDyn-application pH, we have made similar  
474 observations in a previous study using TEVC [17].

475 PcTx1 inhibited or potentiated AzF-containing hASIC1a variants in a pH dependent manner, in line  
476 with previous reports [39]. We examined a total of five variants, of which all except T236AzF also  
477 formed covalent complexes with the toxin upon UV exposure (Figure 5C). While PcTx1 still  
478 modulates and therefore interacts with hASIC1a T236AzF (Figure 4C+D), we cannot exclude that  
479 introduction of AzF at positions 177, 239, 343 or 351 prevents toxin interaction, as these variants  
480 were not assessed for PcTx1 modulation with APC and did not crosslink to the peptide upon UV  
481 exposure (Figure 5C).

482

#### 483 *Live-cell crosslinking provides a detailed map of the PcTx1-hASIC1a interaction*

484 The acidic pocket is now well established both as a hotspot for channel activation and as a binding  
485 site for pharmacological modulators [17, 23]. In the case of PcTx1, structural data had already

486 outlined the toxin binding site on ASICs [52, 67], but unlike previous work, the crosslinking approach  
487 outlined in this study enables us to covalently trap ligand-channel complexes in living cells. This  
488 represents a notable advantage, especially for highly state-dependent interactions, such as those  
489 between hASIC1a and BigDyn or PcTx1. Additionally, comparing the crosslinking pattern between  
490 two ligands, the approach can indirectly inform on the varying degrees of conformational flexibility of  
491 the ligands: BigDyn is likely to be highly flexible without a strong propensity to adopt a secondary  
492 fold [68, 69], therefore samples a greater conformational space and is thus more likely to undergo  
493 covalent crosslinking at multiple sites (9/9 sites tested at the acidic pocket, [17]). By contrast, PcTx1  
494 folds into a compact and highly stable conformation and will consequently undergo covalent  
495 crosslinking at relatively fewer sites (4/9 sites tested at the acidic pocket, Figure 5). These findings  
496 also complement an earlier investigation of the key interactions between PcTx1 and ASIC1a that  
497 concluded for the majority of contacts observed in the crystal structures to not persist during MD  
498 simulations or to not be functionally relevant for PcTx1-mediated inhibition of ASIC1a [58].

499 The ability to covalently trap ligand-receptor complexes offers a unique opportunity to directly assess  
500 if ASIC mutations shown to alter or abolish ligand effects still bind to the same site on the receptor.  
501 For example, the hASIC1a F352L mutation at the base of the acidic pocket is known to almost  
502 completely abolish the PcTx1-dependent modulation of ASIC1a channels [57, 58]. Yet it remained  
503 unclear if the toxin also interacts with the acidic pocket in these mutant channels. Here, we directly  
504 demonstrate that PcTx1 still binds to the acidic pocket, even at a concentration that is far too low to  
505 have a functional effect on the mutant channels (100 nM). This leads us to propose that the F352L  
506 mutation primarily affects conformational changes responsible for the PcTx1 effect on WT hASIC1a,  
507 but not toxin binding *per se*.

508 We note that unlike AzF, we were unable to employ Bpa for crosslinking experiments with PcTx1.  
509 To test if introduction of the more bulky photocrosslinker prevents toxin interaction, we assessed  
510 PcTx1 modulation of selected variants with APC and found robust inhibition for most variants,  
511 indicating that Bpa does not fully occlude the acidic pocket (Figure S13). We therefore speculate  
512 that steric constraints due to the positioning of the benzophenone diradical and the more selective  
513 reactivity of Bpa (reacts exclusively with C-H bonds) may play a role [70, 71]. Together, this

514 emphasizes that screens with multiple redundant ncAAs significantly increase chances of observing  
515 successful crosslinking.

516

### 517 *Limitations of the outlined APC-based approach*

518 While our work establishes that ncAA-containing ion channels can be screened on an APC platform,  
519 some limitations persist. Firstly, our present approach relies on simultaneous transfection of four  
520 plasmids (Figure 1), which can negatively impact transfection efficiency and/or result in cells not  
521 containing all four components. Careful optimization of DNA amounts and transfection conditions is  
522 therefore necessary and a revised construct design to reduce the number of plasmids could further  
523 improve yields. For example, the Plested group achieved co-expression of TAG-containing AMPAR  
524 and GFP with an internal ribosome entry site (IRES) [5, 7], while Rook *et al.* used ASIC1a with a C-  
525 terminally fused GFP-tag [8]. Furthermore, both Zhu and co-workers and Rook *et al.* created  
526 bidirectional plasmids to encode both AzF-RS or Bpa-RS and tRNA, respectively [6, 8]. This latter  
527 strategy might be particularly fruitful for the incorporation of Se-AbK, which was generally less  
528 efficient than that of AzF and Bpa (Figure 2E and Table S1), despite others reporting robust  
529 incorporation of a similar ncAA [72].

530 Secondly, while GFP fluorescence indicates successful transfection and ncAA incorporation and  
531 thereby increased likelihood of observing proton-gated currents in cells grown in the presence of  
532 ncAA, it is not a reliable proxy for incorporation specificity in control cells grown in the absence of  
533 ncAA. This is due to the fact that the degree of unspecific incorporation in GFP does not correlate  
534 with that of the ncAA-containing hASIC1a variants. We consistently observed GFP fluorescence in  
535 only around 2% of the control cells, independent of the co-expressed channel variant, which  
536 translated to insufficient cell numbers for APC (requires a minimal concentration of 100.000 cells/ml).  
537 Assuming that the transfection rates are similar in the presence and absence of ncAA (i.e. around  
538 11%, Figure S1B), we concluded that recording a larger number of unsorted control cells is the more  
539 stringent approach to assess incorporation efficiency. We therefore did not subject the incorporation  
540 control cells to FACS and instead conducted APC with the entire unsorted cell population. To  
541 evaluate this strategy, we randomly selected 45 hASIC1a variants assessed for ncAA incorporation  
542 in the N-terminus, ECD or C-terminus and compared the number of wells harbouring a patched cell

543 with >100 M $\Omega$  seal and those showing proton-gated currents in presence and absence of ncAA  
544 (Figure S1C). While the percentage of cells with current is generally lower for cells grown in the  
545 absence of ncAA, we do observe currents for those positions where incorporation is unspecific, e.g.  
546 throughout the C-terminus and in some positions in the N-terminus. For the control samples, an  
547 average of 9.8 out of 16 possible wells contained a cell with >100 M $\Omega$  seal, and we observed currents  
548 in 1.6 wells on average. We therefore conclude that despite some shortcomings, the employed  
549 strategy using non-sorted controls detects at least those positions with unspecific incorporation of  
550 >15% (i.e. 1.6/9.8).

551 Thirdly, while APC platforms offer unprecedented throughput and speed, there are limitations with  
552 regards to the rate and extent of perfusion exchange. This can be particularly challenging for ligand  
553 application to fast-gating ligand-gated ion channels (i.e. pH changes for ASIC1a) in general and  
554 strongly state-dependent pharmacological modulation (by e.g. BigDyn or PcTx1) in particular.  
555 Although we were able to partially overcome these issues by employing a solution stacking  
556 approach, we cannot draw detailed conclusions about activation or desensitization kinetics.  
557 Similarly, values for proton-dependent activation and especially SSD can be determined with greater  
558 precision using TEVC or manual patch-clamp electrophysiology. However, note that the values  
559 reported here are generally in agreement with previous reports, both with regards to WT values [46,  
560 47] and relative shifts caused by mutations, i.e. in the acidic pocket [23].

561 Lastly, limitations arise from the accessibility and running costs of APC platforms compared to  
562 conventional patch-clamp set ups. But we anticipate that the establishment of academic core  
563 facilities for high-throughput electrophysiology (e.g. Northwestern University, IL, US; University of  
564 Nantes, France; Illawarra Health and Medical Research Institute, Wollongong, Australia) and  
565 collaborations between academia and industry (this study, [73-76]) will likely contribute to a broader  
566 accessibility. This is also evident from the rising number of publications involving APC (currently >80  
567 publications according to vendor information).

568

### 569 *Conclusions and outlook*

570 The ability to functionally screen ncAA-containing ion channels on APC platforms has the potential  
571 to greatly expand the use of ncAAs in both academic and industry settings. The intrinsically high



572 throughput enables rapid assessment of incorporation efficiencies, functional properties and even  
573 complex pharmacological modulation. In principle, the approach can be used for both site-specific  
574 (this study) and global ncAA incorporation [77, 78], thus further increasing the number and type of  
575 chemical modifications that can be introduced. In the case of incorporation of photocrosslinking  
576 ncAAs, the approach can be exploited to crosslink to peptides (Figure 5, [17]), small molecules [13]  
577 or establish intra-protein crosslinking, including in protein complexes [8, 9]. Furthermore, the recently  
578 developed ability for on-chip optostimulation on related APC platforms [79] offers exciting prospects  
579 for potentially conducting UV-mediated crosslinking during live APC experiments in the future. Paired  
580 with MS and/or biochemical approaches [80, 81], the overall strategy could also be expanded to  
581 define interaction sites of unknown or known protein-protein interactions. Given that there are now  
582 well over 100 different ncAAs available for incorporation into proteins in mammalian cells [1, 82], the  
583 above approach will enable the efficient study of ion channels endowed with a wide range of  
584 properties or functionalities.

## 585 **Material and Methods**

586 **Molecular biology.** The complementary DNA (cDNA) encoding human ASIC1a (hASIC1a) was  
587 kindly provided by Dr. Stephan Kellenberger. Plasmids containing AzF-RS, Bpa-RS and tRNA were  
588 gifts from Dr. Thomas P. Sakmar [43]. AbK-RS and tRNA<sub>pyl</sub> in pcDNA3.1 were kindly provided by Dr.  
589 Chris Ahern [44]. The dominant negative eukaryotic release factor (DN-eRF) was a gift from Dr.  
590 William Zagotta [83]. Plasmids containing rat GluA2 Q607 Y533TAG or S729TAG were gifts from  
591 Dr. Andrew Plested [5, 7], rat GluA2 Q607 WT was kindly provided by Dr. Anders Skov Kristensen.  
592 Rat P2X2 WT 3T was a gift from Dr. Thomas Grutter [50], the K296TAG variant was generated in-  
593 house.

594 Site-directed mutagenesis was performed using PfuUltrall Fusion polymerase (Agilent, Denmark)  
595 and custom DNA mutagenesis primers (Eurofins Genomics, Germany). All sequences were  
596 confirmed by sequencing of the full coding frame (Eurofins Genomics). For hASIC1a constructs, a  
597 C-terminal 1D4-tag was added for protein purification and Western blot detection and two silent  
598 mutations were inserted at V10 and L30 to reduce the risk of potential reinitiation [84].

599

600 **Cell culture and transfection.** HEK 293T cells (ATCC®), in which endogenous hASIC1a was  
601 removed by CRISPR/Cas9 [17], were grown in monolayer in T75 or T175 flasks (Orange Scientific,  
602 Belgium) in DMEM (Gibco, Denmark) supplemented with 10 % FBS (Thermo Fisher Scientific,  
603 Denmark) and 1 % penicillin-streptomycin (Thermo Fisher Scientific) and incubated at 37 °C in a  
604 humidified 5 % CO<sub>2</sub> atmosphere. For APC experiments, cells were seeded into six-well plates  
605 (Orange Scientific) at a density of 300.000 cells/well and transfected the next day with Trans-IT LT1  
606 (Mirus, WI, USA) and 1:1:1:1 µg DNA encoding hASIC1a TAG variants, ncAA-RS, tRNA and eGFP  
607 Y40TAG or Y151TAG, respectively. For the WT control, cells were transfected with 1 µg hASIC1a  
608 WT and 0.3 µg eGFP WT. Six hours after transfection, cell medium was replaced with supplemented  
609 DMEM containing 10 µM AzF- or Bpa-methylester (synthesis in SI) or 100 µM Se-AbK (custom-  
610 synthesized by ChiroBlock, Germany). FACS and APC recordings were performed 48 hours after  
611 transfection. The same procedure was used for GluA2 and P2X2R recordings.

612 For crosslinking studies, cells were seeded into 15 cm dishes (VWR, Denmark) at a density of 5-7  
613 million cells and transfected the next day with PEI (Polysciences, Germany) and 16:4:4:8 µg DNA

614 encoding hASIC1a TAG variants, AzF-RS, tRNA and DN-eRF, respectively. For WT controls,  
615 2 million cells were seeded into a 10 cm dish (VWR) and transfected with 8 µg hASIC1a WT. Six  
616 hours after transfection, cell medium was replaced with supplemented DMEM containing 0.5 mM  
617 AzF (Chem Impex, IL, USA) or 1 mM Bpa (Bachem Bio, Switzerland) and crosslinking studies were  
618 performed 48 hours after transfection. Please note that for crosslinking studies followed by Western  
619 blot, the free acid version of the ncAAs was used to increase protein yields.

620

621 **FACS.** HEK 293T cells were washed with PBS, treated with Accutase (Sigma Aldrich, Denmark) or  
622 Trypsin-EDTA (Thermo Fisher Scientific), pooled and centrifuged at 1000 rpm for 5 min. They were  
623 resuspended in 350 µl of a 1:1 mixture of serum-free Hams F-12 nutrient mixture and extracellular  
624 patch-clamp solution (140 mM NaCl, 4 mM KCl, 1 mM MgCl<sub>2</sub>, 2 mM CaCl<sub>2</sub>, 10 mM HEPES, pH 7.4)  
625 supplemented with 20 mM HEPES and transported to the FACS core facility at ambient temperature.  
626 A FACSAria I or III (BD Biosciences, CA, USA) with a 70 µm nozzle was used to sort cells for  
627 singularity, size and GFP fluorescence (Excitation 488 nm, Emission 502 nm (low pass) and 530/30  
628 nm (band pass)). Cells were filtered through a sterile 50 µm cup filcon (BD Biosciences) directly  
629 before sorting to prevent clogging of the nozzle. The WT control was used to set the fluorescence  
630 cutoff between GFP-positive and GFP-negative populations and to check the purity of the sort before  
631 sorting 1 million GFP-positive cells for subsequent patch-clamp experiments. Where possible, a  
632 minimum of 200000 GFP-positive cells were collected for hASIC1a TAG variants grown in presence  
633 of ncAA, while controls grown in absence of ncAA and untransfected cells were not sorted. Cells  
634 were collected in 1.5 ml tubes containing the 1:1 mixture mentioned above and transported to the  
635 APC instrument at ambient temperature.

636

637 **Automated patch-clamp.** Automated whole-cell patch-clamp recordings were conducted on a  
638 SyncroPatch 384PE (Nanion Technologies, Germany) directly after FACS sorting. Cells were loaded  
639 into a teflon-coated plastic boat at concentrations of 1 million cells/ml (WT, controls grown in absence  
640 of ncAA and untransfected cells) or 200000–400000 cells/ml (variants grown in presence of ncAA)  
641 and incubated at 20 °C and 200 rpm. For patch-clamp recordings, a NPC<sup>®</sup>-384 medium resistance  
642 single hole chip (Nanion Technologies) was filled with intracellular solution (120 mM KF, 20 mM KCl,

643 10 mM HEPES, pH 7.2) and extracellular solution (140 mM NaCl, 4 mM KCl, 1 mM MgCl<sub>2</sub>, 2 mM  
644 CaCl<sub>2</sub>, 10 mM HEPES, pH 7.4). 30 µl of cells were loaded into each well and the cells were caught  
645 on the holes by brief application of -200 mbar pressure and washed with 30 µl seal enhancer solution  
646 (extracellular solution with 8 mM Ca<sup>2+</sup>) under a holding pressure of -50 mbar. After a wash step with  
647 extracellular solution, two more pulses of -200 mbar were applied to reach whole cell configuration  
648 and the cells were clamped at 0 mV under atmospheric pressure (Figure S9A). For recordings of  
649 concentration-response curves, extracellular solutions at different pH were applied using a liquid  
650 stacking approach. Briefly, pipette tips were loaded with 45 µl of pH 7.4 wash solution followed by  
651 5 µl of activating extracellular solution (pH 7.2-4.8). For each sweep, the baseline current was  
652 recorded for 1 sec before application of the 5 µl activating solution, while the pH 7.4 wash solution  
653 was dispensed with a delay of 5 sec to allow for recording of channel opening and desensitization in  
654 the presence of ligand. The second dispensation was directly followed by aspiration of liquid and a  
655 second wash step with pH 7.4 before application of the next activating pH (interval between stimuli  
656 140 sec, Figure S9B).

657 For SSD curve recordings, cells were exposed to an activating pH of 5.6 using the stacked addition  
658 protocol described above, while the conditioning pH was varied (pH 7.6-6.4). The open-well system  
659 of the SyncroPatch 384PE does not allow a single exchange of the entire liquid surrounding the cell,  
660 as this would result in destabilization or loss of the seal. Instead, the conditioning pH was adjusted  
661 stepwise by repeated addition and removal of 50% of the solution in the well, leading to 6 min  
662 conditioning intervals between stimuli (Figure S9C). While this process was simulated at the pH  
663 meter to determine the apparent conditioning pH, small variations may occur due to mixing effects.  
664 The authors note that APC instruments operating with microfluidic flow channels might offer superior  
665 control of the conditioning pH. At the end of each SSD curve recording, a control application of pH  
666 5.6 after conditioning pH 7.6 was used to assess the extent of current rescue and exclude cells that  
667 did not recover from SSD.

668 For peptide modulation experiments, 0.1 % (w/v) bovine serum albumin (BSA, Sigma Aldrich) was  
669 added to the conditioning solutions to reduce peptide loss on boat and tip surfaces. To investigate  
670 modulation by BigDyn (synthesis described in [17]), cells were first exposed to two activations with  
671 pH 5.6 after conditioning at pH 7.6 to determine the control current, followed by two rounds of

672 activation after 2 min conditioning with a pH that induces SSD (total interval between stimuli: 8 min,  
673 due to the conditioning protocol described above) and a control activation to evaluate current  
674 recovery. For half of the cell population, 3  $\mu\text{M}$  BigDyn were co-applied during the second conditioning  
675 period to measure rescue from SSD. This assessment of SSD and recovery was repeated with  
676 peptide co-application during the first SSD-conditioning to also evaluate peptide wash out. To assess  
677 modulation by PcTx1 (Alomone labs, Israel, >95% purity), cells were exposed to two control  
678 measurements of activation with pH 5.6 after conditioning at pH 7.4 (interval 3.75 min), followed by  
679 pH 5.6 activation after incubation with 100 nM PcTx1 at varying pH (pH 7.4-7.0) for 2 min (total  
680 interval between stimuli 7 min), as well as two further controls to assess recovery from modulation.  
681 For recordings on GluA2 and P2X2R variants, cells were clamped at -60 mV and currents activated  
682 by application of 30  $\mu\text{M}$  and 300  $\mu\text{M}$ /10 mM ATP or glutamate, respectively. Cells expressing GluA2  
683 were pre-incubated with 100  $\mu\text{M}$  cyclothiazide (in 0.8% (v/v) DMSO) for 60 sec before activation to  
684 slow desensitization (total interval between stimuli: 220 sec) [51].

685

686 **Data analysis.** Current traces were acquired at 2 kHz and filtered in the DataControl384 software  
687 using a Butterworth 4th order low pass filter at 45 Hz to remove solution artefacts. Only cells with  
688 initial seals >100 M $\Omega$  were considered for biophysical characterization using GraphPad Prism 7 or  
689 8, while wells with lower seals, no current or no caught cell were excluded. The relatively low seal  
690 cutoff in combination with the large proton-gated currents (up to 10 nA) recorded for WT and some  
691 of the ncAA-containing variants resulted in suboptimal voltage-clamp conditions for a subpopulation  
692 of cells, as also apparent from the current shapes. However, we have no evidence that this adversely  
693 affected activation parameters or pharmacological modulation. Where possible, APC data was  
694 pooled from a minimum of three cells and two separate recording days. On several occasions, an *n*  
695 of five or more was acquired during the first screening trial, in which case the experiment was not  
696 repeated. Current sizes were normalized to the respective control currents and half-maximal  
697 concentrations ( $\text{EC}_{50}$  values) and Hill slopes ( $n_H$ ) calculated using equation (1).  $\text{pH}_{50}$  values were  
698 calculated in Excel using equation (2). All values are expressed as mean  $\pm$  S.D. (Standard  
699 Deviation). The extent of tachyphylaxis for each recording was calculated by subtraction of the  
700 normalized current at lowest pH from the normalized maximal current (> 20 % tachyphylaxis is

701 marked by (#)). Bar graphs and dot plots were made using GraphPad Prism 7 or 8 and SigmaPlot  
702 13.0, while current traces were exported to Clampfit 10.5 and Adobe Illustrator CC 2019.

703 Equation (1): 
$$Y = \frac{100 * (EC_{50}^{Hillslope})}{(EC_{50}^{Hillslope} + (x^{Hillslope}))}$$

704 Equation (2): 
$$pH_{50} = -\log_{10}(EC_{50}[M])$$

705 Mean current sizes and  $pH_{50}$  values of different cell lines and constructs were compared using  
706 student's t-test, Mann Whitney test or one-way ANOVA followed by Tukey's multiple comparisons  
707 test.

708

709 **Crosslinking studies, protein purification, western blotting.** Cells were washed with PBS and  
710 dislodged using cell scrapers (Orange Scientific). After centrifugation (1000 rpm, 5 min), cell pellets  
711 were resuspended in 1 mL PBS pH 7.4 containing 100 nM biotinyl-PcTx1 (Phoenix Pharmaceuticals,  
712 CA, USA) and transferred into 12 well plates (Orange Scientific). Cells were placed on ice and  
713 crosslinked at a distance of 7-10 cm to a Maxima ML-3500 S UV-A light source (Spectronics  
714 corporation, 365 nm) for 15 min (AzF) or up to 60 min (Bpa). Control samples without UV exposure  
715 were kept at 4 °C. After crosslinking, cells were centrifuged (1000 rpm, 5 min) and resuspended in  
716 1 mL solubilisation buffer (50 mM Tris-HCl, 145 mM NaCl, 5 mM EDTA, 2 mM DDM, pH 7.5)  
717 supplemented with cComplete™ EDTA-free protease inhibitor cocktail (Sigma Aldrich). Cells were  
718 lysed (2 h, 4 °C) and centrifuged for 30 min (18000 g/4 °C). In parallel, 40 µL Dynabeads Protein G  
719 (Thermo Fisher Scientific) were washed with 200 µL PBS/0.2 mM DDM and incubated with 4 µg  
720 RHO 1D4 antibody (University of British Columbia) in 50 µL PBS/0.2 mM DDM on a ferris wheel  
721 (VWR, 30 min). After washing the beads PBS/0.2 mM DDM (with 200 µL), the cell lysate supernatant  
722 was incubated with the beads on a ferris wheel (4 °C, 90 min). Beads were washed with 200 µL PBS  
723 three times to remove nonspecifically bound proteins and incubated in 25 µL elution buffer (2:1  
724 mixture between 50 mM glycine, pH 2.8 and 62.5 mM Tris-HCl, 2.5 % SDS, 10 % Glycerol, pH 6.8)  
725 supplemented with 80 mM DTT at 70 °C for 10 min. Protein samples (12 µL) were mixed with 3 µL  
726 5 M DTT and 5 µL 4x NuPAGE™ LDS sample buffer (Thermo Fisher Scientific) and incubated (95  
727 °C, 20 min) before SDS-PAGE using 3–8 % Tris-Acetate protein gels (Thermo Fisher Scientific).  
728 After transfer onto PVDF membranes (iBlot 2 Dry Blotting System, Thermo Fisher Scientific) and

729 blocking in TBST/3% non-fat dry milk for 1 hour, hASIC1a was detected using RHO 1D4 antibody (1  
730  $\mu\text{g}/\mu\text{L}$ , University of British Columbia) and 1:5000 goat anti-mouse IgG HRP-conjugate (Thermo  
731 Fisher Scientific). Biotinyl-PcTx1 was detected using 1:1000 rabbit anti-biotin antibody (abcam, UK)  
732 and 1:5000 goat anti-rabbit IgG HRP-conjugate (Promega, Denmark). Samples used for  
733 incorporation controls were treated as above, but were not exposed to UV light.

734 **Funding**

735 We acknowledge the Lundbeck Foundation (R139-2012-12390 to SAP and R218-2016-1490 to NB),  
736 the Boehringer Ingelheim Fond (to NB) and the University of Copenhagen for financial support.

737

738 **Acknowledgements**

739 We acknowledge the FACS core facility at the Biotech Research & Innovation Center (University of  
740 Copenhagen) for technical support. We thank Dr. Iacopo Galleano for the synthesis of AzF- and  
741 Bpa-ME, Dr. Christian Bernsen Borg for the synthesis of big dynorphin and members of the Pless  
742 laboratory for comments on the manuscript. Figure 1 was created with BioRender.com.

743

744 **Competing interests**

745 Søren Friis is a full-time employee of Nanion Technologies. The other authors declare no competing  
746 interests.



747

748 **References**

- 749 1. Chin JW. Expanding and reprogramming the genetic code. *Nature*. 2017;550(7674):53-60.  
750 doi: 10.1038/nature24031. PubMed PMID: 28980641.
- 751 2. Braun N, Sheikh ZP, Pless SA. The current chemical biology tool box to study ion channels.  
752 *J Physiol*. 2020. doi: 10.1113/JP276695. PubMed PMID: 32715480.
- 753 3. Paoletti P, Ellis-Davies GCR, Mouro A. Optical control of neuronal ion channels and  
754 receptors. *Nat Rev Neurosci*. 2019. doi: 10.1038/s41583-019-0197-2. PubMed PMID: 31289380.
- 755 4. Klippenstein V, Mony L, Paoletti P. Probing Ion Channel Structure and Function Using Light-  
756 Sensitive Amino Acids. *Trends Biochem Sci*. 2018;43(6):436-51. doi: 10.1016/j.tibs.2018.02.012.  
757 PubMed PMID: 29650383.
- 758 5. Klippenstein V, Ghisi V, Wietstruk M, Plested AJ. Photoinactivation of glutamate receptors  
759 by genetically encoded unnatural amino acids. *J Neurosci*. 2014;34(3):980-91. doi:  
760 10.1523/JNEUROSCI.3725-13.2014. PubMed PMID: 24431456.
- 761 6. Zhu S, Riou M, Yao CA, Carvalho S, Rodriguez PC, Bensaude O, et al. Genetically encoding  
762 a light switch in an ionotropic glutamate receptor reveals subunit-specific interfaces. *Proc Natl Acad*  
763 *Sci U S A*. 2014;111(16):6081-6. doi: 10.1073/pnas.1318808111. PubMed PMID: 24715733;  
764 PubMed Central PMCID: PMC4000820.
- 765 7. Poulsen MH, Poshtiban A, Klippenstein V, Ghisi V, Plested AJR. Gating modules of the  
766 AMPA receptor pore domain revealed by unnatural amino acid mutagenesis. *Proc Natl Acad Sci U*  
767 *S A*. 2019;116(27):13358-67. doi: 10.1073/pnas.1818845116. PubMed PMID: 31213549; PubMed  
768 Central PMCID: PMC6613130.
- 769 8. Rook ML, Williamson A, Lueck JD, Musgaard M, Maclean DM. beta11-12 linker isomerization  
770 governs acid-sensing ion channel desensitization and recovery. *Elife*. 2020;9. doi:  
771 10.7554/eLife.51111. PubMed PMID: 32031522; PubMed Central PMCID: PMC7041949.
- 772 9. Murray CI, Westhoff M, Eldstrom J, Thompson E, Emes R, Fedida D. Unnatural amino acid  
773 photo-crosslinking of the IKs channel complex demonstrates a KCNE1:KCNQ1 stoichiometry of up  
774 to 4:4. *Elife*. 2016;5. doi: 10.7554/eLife.11815. PubMed PMID: 26802629; PubMed Central PMCID:  
775 PMC4807126.
- 776 10. Westhoff M, Murray CI, Eldstrom J, Fedida D. Photo-Cross-Linking of IKs Demonstrates  
777 State-Dependent Interactions between KCNE1 and KCNQ1. *Biophys J*. 2017;113(2):415-25. doi:  
778 10.1016/j.bpj.2017.06.005. PubMed PMID: 28746852; PubMed Central PMCID: PMC5529200.
- 779 11. Martin GM, Rex EA, Devaraneni P, Denton JS, Boodhansingh KE, DeLeon DD, et al.  
780 Pharmacological Correction of Trafficking Defects in ATP-sensitive Potassium Channels Caused by  
781 Sulfonylurea Receptor 1 Mutations. *J Biol Chem*. 2016;291(42):21971-83. doi:  
782 10.1074/jbc.M116.749366. PubMed PMID: 27573238; PubMed Central PMCID: PMC5063981.

- 783 12. Tian M, Ye S. Allosteric regulation in NMDA receptors revealed by the genetically encoded  
784 photo-cross-linkers. *Sci Rep.* 2016;6:34751. doi: 10.1038/srep34751. PubMed PMID: 27713495;  
785 PubMed Central PMCID: PMCPMC5054432.
- 786 13. Rannversson H, Andersen J, Sorensen L, Bang-Andersen B, Park M, Huber T, et al.  
787 Genetically encoded photocrosslinkers locate the high-affinity binding site of antidepressant drugs  
788 in the human serotonin transporter. *Nat Commun.* 2016;7:11261. doi: 10.1038/ncomms11261.  
789 PubMed PMID: 27089947; PubMed Central PMCID: PMCPMC4838859.
- 790 14. Coin I, Katritch V, Sun T, Xiang Z, Siu FY, Beyermann M, et al. Genetically encoded chemical  
791 probes in cells reveal the binding path of urocortin-I to CRF class B GPCR. *Cell.* 2013;155(6):1258-  
792 69. doi: 10.1016/j.cell.2013.11.008. PubMed PMID: 24290358; PubMed Central PMCID:  
793 PMC3916339.
- 794 15. Bottke T, Ernicke S, Serfling R, Ihling C, Burda E, Gurevich VV, et al. Exploring GPCR-  
795 arrestin interfaces with genetically encoded crosslinkers. *EMBO Rep.* 2020:e50437. doi:  
796 10.15252/embr.202050437. PubMed PMID: 32929862.
- 797 16. Reiners M, Margreiter MA, Oslender-Bujotzek A, Rossetti G, Grunder S, Schmidt A. The  
798 Conorfamide RPRFa Stabilizes the Open Conformation of Acid-Sensing Ion Channel 3 via the  
799 Nonproton Ligand-Sensing Domain. *Mol Pharmacol.* 2018;94(4):1114-24. doi:  
800 10.1124/mol.118.112375. PubMed PMID: 30012583.
- 801 17. Borg CB, Braun N, Heusser SA, Bay Y, Weis D, Galleano I, et al. Mechanism and site of  
802 action of big dynorphin on ASIC1a. *Proc Natl Acad Sci U S A.* 2020;117(13):7447-54. doi:  
803 10.1073/pnas.1919323117. PubMed PMID: 32165542; PubMed Central PMCID:  
804 PMCPMC7132280.
- 805 18. Kuenze G, Vanoye CG, Desai RR, Adusumilli S, Brewer KR, Woods H, et al. Allosteric  
806 mechanism for KCNE1 modulation of KCNQ1 potassium channel activation. *Elife.* 2020;9. doi:  
807 10.7554/eLife.57680. PubMed PMID: 33095155; PubMed Central PMCID: PMCPMC7584456.
- 808 19. Shen W, Ren W, Zhai S, Yang B, Vanoye CG, Mitra A, et al. Striatal Kir2 K<sup>+</sup> channel inhibition  
809 mediates the antidyskinetic effects of amantadine. *J Clin Invest.* 2020;130(5):2593-601. doi:  
810 10.1172/JCI133398. PubMed PMID: 32310223; PubMed Central PMCID: PMCPMC7190977.
- 811 20. Silvera Ejneby M, Wallner B, Elinder F. Coupling stabilizers open KV1-type potassium  
812 channels. *Proc Natl Acad Sci U S A.* 2020;117(43):27016-21. doi: 10.1073/pnas.2007965117.  
813 PubMed PMID: 33051293; PubMed Central PMCID: PMCPMC7604479.
- 814 21. Xu H, Li T, Rohou A, Arthur CP, Tzakoniati F, Wong E, et al. Structural Basis of Nav1.7  
815 Inhibition by a Gating-Modifier Spider Toxin. *Cell.* 2019;176(4):702-15 e14. doi:  
816 10.1016/j.cell.2018.12.018. PubMed PMID: 30661758.
- 817 22. Chernov-Rogan T, Li T, Lu G, Verschoof H, Khakh K, Jones SW, et al. Mechanism-specific  
818 assay design facilitates the discovery of Nav1.7-selective inhibitors. *Proc Natl Acad Sci U S A.*  
819 2018;115(4):E792-E801. doi: 10.1073/pnas.1713701115. PubMed PMID: 29311306; PubMed  
820 Central PMCID: PMCPMC5789920.

- 821 23. Rook ML, Musgaard M, MacLean DM. Coupling structure with function in acid-sensing ion  
822 channels: challenges in pursuit of proton sensors. *J Physiol*. 2020. doi: 10.1113/JP278707. PubMed  
823 PMID: 32306405.
- 824 24. Wemmie JA, Taugher RJ, Kreple CJ. Acid-sensing ion channels in pain and disease. *Nat*  
825 *Rev Neurosci*. 2013;14(7):461-71. doi: 10.1038/nrn3529. PubMed PMID: 23783197; PubMed  
826 Central PMCID: PMC4307015.
- 827 25. Vullo S, Kellenberger S. A molecular view of the function and pharmacology of acid-sensing  
828 ion channels. *Pharmacol Res*. 2020;154:104166. doi: 10.1016/j.phrs.2019.02.005. PubMed PMID:  
829 30731197.
- 830 26. Diochot S, Baron A, Salinas M, Douguet D, Scarzello S, Dabert-Gay AS, et al. Black mamba  
831 venom peptides target acid-sensing ion channels to abolish pain. *Nature*. 2012;490(7421):552-5.  
832 doi: 10.1038/nature11494. PubMed PMID: 23034652.
- 833 27. Verkest C, Piquet E, Diochot S, Dauvois M, Lanteri-Minet M, Lingueglia E, et al. Effects of  
834 systemic inhibitors of acid-sensing ion channels 1 (ASIC1) against acute and chronic mechanical  
835 allodynia in a rodent model of migraine. *Br J Pharmacol*. 2018;175(21):4154-66. doi:  
836 10.1111/bph.14462. PubMed PMID: 30079481; PubMed Central PMCID: PMC6177611.
- 837 28. Bohlen CJ, Chesler AT, Sharif-Naeini R, Medzihradzsky KF, Zhou S, King D, et al. A  
838 heteromeric Texas coral snake toxin targets acid-sensing ion channels to produce pain. *Nature*.  
839 2011;479(7373):410-4. doi: 10.1038/nature10607. PubMed PMID: 22094702; PubMed Central  
840 PMCID: PMC3226747.
- 841 29. Lee JYP, Saez NJ, Cristofori-Armstrong B, Anangi R, King GF, Smith MT, et al. Inhibition of  
842 acid-sensing ion channels by diminazene and APETx2 evoke partial and highly variable  
843 antihyperalgesia in a rat model of inflammatory pain. *Br J Pharmacol*. 2018;175(12):2204-18. Epub  
844 2017/11/15. doi: 10.1111/bph.14089. PubMed PMID: 29134638; PubMed Central PMCID:  
845 PMC615980509.
- 846 30. Reimers C, Lee CH, Kalbacher H, Tian Y, Hung CH, Schmidt A, et al. Identification of a cono-  
847 RFamide from the venom of *Conus textile* that targets ASIC3 and enhances muscle pain. *Proc Natl*  
848 *Acad Sci U S A*. 2017;114(17):E3507-E15. Epub 2017/04/12. doi: 10.1073/pnas.1616232114.  
849 PubMed PMID: 28396446; PubMed Central PMCID: PMC5410773.
- 850 31. Xiong ZG, Zhu XM, Chu XP, Minami M, Hey J, Wei WL, et al. Neuroprotection in ischemia:  
851 blocking calcium-permeable acid-sensing ion channels. *Cell*. 2004;118(6):687-98. Epub 2004/09/17.  
852 doi: 10.1016/j.cell.2004.08.026. PubMed PMID: 15369669.
- 853 32. Wang YZ, Wang JJ, Huang Y, Liu F, Zeng WZ, Li Y, et al. Tissue acidosis induces neuronal  
854 necroptosis via ASIC1a channel independent of its ionic conduction. *Elife*. 2015;4. doi:  
855 10.7554/eLife.05682. PubMed PMID: 26523449; PubMed Central PMCID: PMC4629285.
- 856 33. Wang JJ, Liu F, Yang F, Wang YZ, Qi X, Li Y, et al. Disruption of auto-inhibition underlies  
857 conformational signaling of ASIC1a to induce neuronal necroptosis. *Nat Commun*. 2020;11(1):475.

- 858 doi: 10.1038/s41467-019-13873-0. PubMed PMID: 31980622; PubMed Central PMCID:  
859 PMCPMC6981194.
- 860 34. Chassagnon IR, McCarthy CA, Chin YK, Pineda SS, Keramidas A, Mobli M, et al. Potent  
861 neuroprotection after stroke afforded by a double-knot spider-venom peptide that inhibits acid-  
862 sensing ion channel 1a. *Proc Natl Acad Sci U S A*. 2017;114(14):3750-5. Epub 2017/03/23. doi:  
863 10.1073/pnas.1614728114. PubMed PMID: 28320941; PubMed Central PMCID:  
864 PMCPMC5389327.
- 865 35. McCarthy CA, Rash LD, Chassagnon IR, King GF, Widdop RE. PcTx1 affords  
866 neuroprotection in a conscious model of stroke in hypertensive rats via selective inhibition of ASIC1a.  
867 *Neuropharmacology*. 2015;99:650-7. Epub 2015/09/01. doi: 10.1016/j.neuropharm.2015.08.040.  
868 PubMed PMID: 26320544.
- 869 36. Rash LD. Acid-Sensing Ion Channel Pharmacology, Past, Present, and Future. *Adv*  
870 *Pharmacol*. 2017;79:35-66. Epub 2017/05/23. doi: 10.1016/bs.apha.2017.02.001. PubMed PMID:  
871 28528673.
- 872 37. Vyvers A, Schmidt A, Wiemuth D, Grunder S. Screening of 109 neuropeptides on ASICs  
873 reveals no direct agonists and dynorphin A, YFMRFamide and endomorphin-1 as modulators. *Sci*  
874 *Rep*. 2018;8(1):18000. doi: 10.1038/s41598-018-36125-5. PubMed PMID: 30573735; PubMed  
875 Central PMCID: PMCPMC6301962.
- 876 38. Baron A, Diochot S, Salinas M, Deval E, Noel J, Lingueglia E. Venom toxins in the exploration  
877 of molecular, physiological and pathophysiological functions of acid-sensing ion channels. *Toxicon*.  
878 2013;75:187-204. Epub 2013/04/30. doi: 10.1016/j.toxicon.2013.04.008. PubMed PMID: 23624383.
- 879 39. Cristofori-Armstrong B, Saez NJ, Chassagnon IR, King GF, Rash LD. The modulation of acid-  
880 sensing ion channel 1 by PcTx1 is pH-, subtype- and species-dependent: Importance of interactions  
881 at the channel subunit interface and potential for engineering selective analogues. *Biochem*  
882 *Pharmacol*. 2019;163:381-90. doi: 10.1016/j.bcp.2019.03.004. PubMed PMID: 30849303.
- 883 40. Sherwood TW, Askwith CC. Dynorphin opioid peptides enhance acid-sensing ion channel 1a  
884 activity and acidosis-induced neuronal death. *J Neurosci*. 2009;29(45):14371-80. doi:  
885 10.1523/JNEUROSCI.2186-09.2009. PubMed PMID: 19906984; PubMed Central PMCID:  
886 PMC2802056.
- 887 41. Escoubas P, De Weille JR, Lecoq A, Diochot S, Waldmann R, Champigny G, et al. Isolation  
888 of a tarantula toxin specific for a class of proton-gated Na<sup>+</sup> channels. *J Biol Chem*.  
889 2000;275(33):25116-21. doi: 10.1074/jbc.M003643200. PubMed PMID: 10829030.
- 890 42. Ye S, Kohrer C, Huber T, Kazmi M, Sachdev P, Yan EC, et al. Site-specific incorporation of  
891 keto amino acids into functional G protein-coupled receptors using unnatural amino acid  
892 mutagenesis. *J Biol Chem*. 2008;283(3):1525-33. doi: 10.1074/jbc.M707355200. PubMed PMID:  
893 17993461.

- 894 43. Ye S, Huber T, Vogel R, Sakmar TP. FTIR analysis of GPCR activation using azido probes.  
895 Nat Chem Biol. 2009;5(6):397-9. doi: 10.1038/nchembio.167. PubMed PMID: 19396177; PubMed  
896 Central PMCID: PMCPMC2875874.
- 897 44. Chatterjee A, Xiao H, Bollong M, Ai HW, Schultz PG. Efficient viral delivery system for  
898 unnatural amino acid mutagenesis in mammalian cells. P Natl Acad Sci USA. 2013;110(29):11803-  
899 8. doi: 10.1073/pnas.1309584110. PubMed PMID: WOS:000322086100042.
- 900 45. Gordon SE, Munari M, Zagotta WN. Visualizing conformational dynamics of proteins in  
901 solution and at the cell membrane. Elife. 2018;7. doi: 10.7554/eLife.37248. PubMed PMID:  
902 29923827; PubMed Central PMCID: PMCPMC6056233.
- 903 46. Sherwood TW, Askwith CC. Endogenous arginine-phenylalanine-amide-related peptides  
904 alter steady-state desensitization of ASIC1a. J Biol Chem. 2008;283(4):1818-30. Epub 2007/11/07.  
905 doi: 10.1074/jbc.M705118200. PubMed PMID: 17984098.
- 906 47. Vaithia A, Vullo S, Peng Z, Alijevic O, Kellenberger S. Accelerated Current Decay Kinetics of  
907 a Rare Human Acid-Sensing ion Channel 1a Variant That Is Used in Many Studies as Wild Type.  
908 Front Mol Neurosci. 2019;12:133. doi: 10.3389/fnmol.2019.00133. PubMed PMID: 31178694;  
909 PubMed Central PMCID: PMCPMC6542941.
- 910 48. Kasimova MA, Lynagh T, Sheikh ZP, Granata D, Borg CB, Carnevale V, et al. Evolutionarily  
911 Conserved Interactions within the Pore Domain of Acid-Sensing Ion Channels. Biophys J.  
912 2020;118(4):861-72. doi: 10.1016/j.bpj.2019.09.001. PubMed PMID: 31630811; PubMed Central  
913 PMCID: PMCPMC7036722.
- 914 49. Chen X, Grunder S. Permeating protons contribute to tachyphylaxis of the acid-sensing ion  
915 channel (ASIC) 1a. J Physiol. 2007;579(Pt 3):657-70. Epub 2007/01/06. doi:  
916 10.1113/jphysiol.2006.120733. PubMed PMID: 17204502; PubMed Central PMCID:  
917 PMCPMC2151377.
- 918 50. Gasparri F, Wengel J, Grutter T, Pless SA. Molecular determinants for agonist recognition  
919 and discrimination in P2X2 receptors. J Gen Physiol. 2019;151(7):898-911. doi:  
920 10.1085/jgp.201912347. PubMed PMID: 31126967; PubMed Central PMCID: PMCPMC6605687.
- 921 51. Yamada KA, Tang CM. Benzothiadiazides inhibit rapid glutamate receptor desensitization  
922 and enhance glutamatergic synaptic currents. J Neurosci. 1993;13(9):3904-15. PubMed PMID:  
923 8103555; PubMed Central PMCID: PMCPMC6576449.
- 924 52. Bacongus I, Gouaux E. Structural plasticity and dynamic selectivity of acid-sensing ion  
925 channel-spider toxin complexes. Nature. 2012;489(7416):400-5. Epub 2012/07/31. doi:  
926 10.1038/nature11375. PubMed PMID: 22842900; PubMed Central PMCID: PMCPMC3725952.
- 927 53. Liu Y, Hagan R, Schoellerman J. Dual actions of Psalmotoxin at ASIC1a and ASIC2a  
928 heteromeric channels (ASIC1a/2a). Sci Rep. 2018;8(1):7179. doi: 10.1038/s41598-018-25386-9.  
929 PubMed PMID: 29739981; PubMed Central PMCID: PMCPMC5940917.
- 930 54. Salinas M, Rash LD, Baron A, Lambeau G, Escoubas P, Lazdunski M. The receptor site of  
931 the spider toxin PcTx1 on the proton-gated cation channel ASIC1a. J Physiol. 2006;570(Pt 2):339-

- 932 54. doi: 10.1113/jphysiol.2005.095810. PubMed PMID: 16284080; PubMed Central PMCID:  
933 PMC1464308.
- 934 55. Ahmed R, Spikings E, Zhou S, Thompsett A, Zhang T. Pre-hybridisation: an efficient way of  
935 suppressing endogenous biotin-binding activity inherent to biotin-streptavidin detection system. *J*  
936 *Immunol Methods*. 2014;406:143-7. doi: 10.1016/j.jim.2014.03.010. PubMed PMID: 24657589.
- 937 56. Praul CA, Brubaker KD, Leach RM, Gay CV. Detection of endogenous biotin-containing  
938 proteins in bone and cartilage cells with streptavidin systems. *Biochem Biophys Res Commun*.  
939 1998;247(2):312-4. doi: 10.1006/bbrc.1998.8757. PubMed PMID: 9642122.
- 940 57. Sherwood T, Franke R, Conneely S, Joyner J, Arumugan P, Askwith C. Identification of  
941 protein domains that control proton and calcium sensitivity of ASIC1a. *J Biol Chem*.  
942 2009;284(41):27899-907. doi: 10.1074/jbc.M109.029009. PubMed PMID: 19654327; PubMed  
943 Central PMCID: PMC2788841.
- 944 58. Saez NJ, Deplazes E, Cristofori-Armstrong B, Chassagnon IR, Lin X, Mobli M, et al.  
945 Molecular dynamics and functional studies define a hot spot of crystal contacts essential for PcTx1  
946 inhibition of acid-sensing ion channel 1a. *Br J Pharmacol*. 2015;172(20):4985-95. doi:  
947 10.1111/bph.13267. PubMed PMID: 26248594; PubMed Central PMCID: PMC4621980.
- 948 59. Obergrussberger A, Friis S, Bruggemann A, Fertig N. Automated patch clamp in drug  
949 discovery: major breakthroughs and innovation in the last decade. *Expert Opin Drug Discov*. 2020:1-  
950 5. doi: 10.1080/17460441.2020.1791079. PubMed PMID: 32646308.
- 951 60. Ke YY, Huang YH, Chien WC, Loh HH, Chuang JY, Yeh SH. Mapping the naloxone binding  
952 sites on the mu-opioid receptor using cell-based photocrosslinkers. *Biochim Biophys Acta Proteins*  
953 *Proteom*. 2017;1865(3):336-43. doi: 10.1016/j.bbapap.2016.12.010. PubMed PMID: 28012872.
- 954 61. Hostetler ZM, Ferrie JJ, Bornstein MR, Sungwienwong I, Petersson EJ, Kohli RM. Systematic  
955 Evaluation of Soluble Protein Expression Using a Fluorescent Unnatural Amino Acid Reveals No  
956 Reliable Predictors of Tolerability. *Acs Chemical Biology*. 2018;13(10):2855-61. doi:  
957 10.1021/acscchembio.8b00696. PubMed PMID: WOS:000448488600005.
- 958 62. Coscoy S, de Weille JR, Lingueglia E, Lazdunski M. The pre-transmembrane 1 domain of  
959 acid-sensing ion channels participates in the ion pore. *J Biol Chem*. 1999;274(15):10129-32.  
960 PubMed PMID: 10187795.
- 961 63. Lynagh T, Flood E, Boiteux C, Wulf M, Komnatny VV, Colding JM, et al. A selectivity filter  
962 at the intracellular end of the acid-sensing ion channel pore. *Elife*. 2017;6. Epub 2017/05/13. doi:  
963 10.7554/eLife.24630. PubMed PMID: 28498103; PubMed Central PMCID: PMC5449180.
- 964 64. Krauson AJ, Carattino MD. The Thumb Domain Mediates Acid-sensing Ion Channel  
965 Desensitization. *J Biol Chem*. 2016;291(21):11407-19. doi: 10.1074/jbc.M115.702316. PubMed  
966 PMID: 27015804; PubMed Central PMCID: PMC4900284.
- 967 65. MacLean DM, Jayaraman V. Deactivation kinetics of acid-sensing ion channel 1a are strongly  
968 pH-sensitive. *Proc Natl Acad Sci U S A*. 2017;114(12):E2504-E13. Epub 2017/03/08. doi:

- 969 10.1073/pnas.1620508114. PubMed PMID: 28265090; PubMed Central PMCID:  
970 PMCPMC5373395.
- 971 66. Li T, Yang Y, Canessa CM. Impact of recovery from desensitization on acid-sensing ion  
972 channel-1a (ASIC1a) current and response to high frequency stimulation. *J Biol Chem.*  
973 2012;287(48):40680-9. Epub 2012/10/11. doi: 10.1074/jbc.M112.418400. PubMed PMID:  
974 23048040; PubMed Central PMCID: PMCPMC3504781.
- 975 67. Dawson RJ, Benz J, Stohler P, Tetaz T, Joseph C, Huber S, et al. Structure of the acid-  
976 sensing ion channel 1 in complex with the gating modifier Psalmotoxin 1. *Nat Commun.* 2012;3:936.  
977 doi: 10.1038/ncomms1917. PubMed PMID: 22760635.
- 978 68. O'Connor C, White KL, Doncescu N, Didenko T, Roth BL, Czaplicki G, et al. NMR structure  
979 and dynamics of the agonist dynorphin peptide bound to the human kappa opioid receptor. *Proc Natl*  
980 *Acad Sci U S A.* 2015;112(38):11852-7. doi: 10.1073/pnas.1510117112. PubMed PMID: 26372966;  
981 PubMed Central PMCID: PMCPMC4586840.
- 982 69. Ferre G, Czaplicki G, Demange P, Milon A. Structure and dynamics of dynorphin peptide and  
983 its receptor. *Vitam Horm.* 2019;111:17-47. doi: 10.1016/bs.vh.2019.05.006. PubMed PMID:  
984 31421700.
- 985 70. Grunbeck A, Huber T, Sachdev P, Sakmar TP. Mapping the ligand-binding site on a G  
986 protein-coupled receptor (GPCR) using genetically encoded photocrosslinkers. *Biochemistry.*  
987 2011;50(17):3411-3. doi: 10.1021/bi200214r. PubMed PMID: 21417335; PubMed Central PMCID:  
988 PMCPMC3099303.
- 989 71. Dorman G, Prestwich GD. Benzophenone photophores in biochemistry. *Biochemistry.*  
990 1994;33(19):5661-73. PubMed PMID: 8180191.
- 991 72. Ai HW, Shen W, Sagi A, Chen PR, Schultz PG. Probing protein-protein interactions with a  
992 genetically encoded photo-crosslinking amino acid. *Chembiochem.* 2011;12(12):1854-7. doi:  
993 10.1002/cbic.201100194. PubMed PMID: 21678540.
- 994 73. Calloe K, Rognant S, Friis S, Shaughnessy C, Klaerke DA, Trachsel D. Compounds  
995 commonly used in equine medicine inhibits the voltage-gated potassium channel Kv11.1. *Res Vet*  
996 *Sci.* 2019;123:239-46. doi: 10.1016/j.rvsc.2019.01.009. PubMed PMID: 30685649.
- 997 74. Sauter DR, Sorensen CE, Rapedius M, Bruggemann A, Novak I. pH-sensitive K(+) channel  
998 TREK-1 is a novel target in pancreatic cancer. *Biochim Biophys Acta.* 2016;1862(10):1994-2003.  
999 doi: 10.1016/j.bbadis.2016.07.009. PubMed PMID: 27443495.
- 1000 75. Ghovanloo MR, Shuart NG, Mezeyova J, Dean RA, Ruben PC, Goodchild SJ. Inhibitory  
1001 effects of cannabidiol on voltage-dependent sodium currents. *J Biol Chem.* 2018;293(43):16546-58.  
1002 doi: 10.1074/jbc.RA118.004929. PubMed PMID: 30219789; PubMed Central PMCID:  
1003 PMCPMC6204917.
- 1004 76. Franz D, Olsen HL, Klink O, Gimsa J. Automated and manual patch clamp data of human  
1005 induced pluripotent stem cell-derived dopaminergic neurons. *Sci Data.* 2017;4:170056. doi:  
1006 10.1038/sdata.2017.56. PubMed PMID: 28440808; PubMed Central PMCID: PMCPMC5404656.

- 1007 77. Gupta K, Toombes GE, Swartz KJ. Exploring structural dynamics of a membrane protein by  
1008 combining bioorthogonal chemistry and cysteine mutagenesis. *Elife*. 2019;8. doi:  
1009 10.7554/eLife.50776. PubMed PMID: 31714877; PubMed Central PMCID: PMC6850778.
- 1010 78. Piotrowski C, Ihling CH, Sinz A. Extending the cross-linking/mass spectrometry strategy:  
1011 Facile incorporation of photo-activatable amino acids into the model protein calmodulin in  
1012 *Escherichia coli* cells. *Methods*. 2015;89:121-7. doi: 10.1016/j.ymeth.2015.02.012. PubMed PMID:  
1013 25726908.
- 1014 79. Boddum K, Skafte-Pedersen P, Rolland JF, Wilson S. Optogenetics and Optical Tools in  
1015 Automated Patch Clamping. *Methods Mol Biol*. 2021;2188:311-30. doi: 10.1007/978-1-0716-0818-  
1016 0\_16. PubMed PMID: 33119859.
- 1017 80. Hoffmann JE. Bifunctional Non-Canonical Amino Acids: Combining Photo-Crosslinking with  
1018 Click Chemistry. *Biomolecules*. 2020;10(4). doi: 10.3390/biom10040578. PubMed PMID: 32290035;  
1019 PubMed Central PMCID: PMC67226127.
- 1020 81. Wu X, Spence JS, Das T, Yuan X, Chen C, Zhang Y, et al. Site-Specific Photo-Crosslinking  
1021 Proteomics Reveal Regulation of IFITM3 Trafficking and Turnover by VCP/p97 ATPase. *Cell Chem  
1022 Biol*. 2020;27(5):571-85 e6. doi: 10.1016/j.chembiol.2020.03.004. PubMed PMID: 32243810;  
1023 PubMed Central PMCID: PMC67194980.
- 1024 82. Dumas A, Lercher L, Spicer CD, Davis BG. Designing logical codon reassignment -  
1025 Expanding the chemistry in biology. *Chem Sci*. 2015;6(1):50-69. doi: 10.1039/c4sc01534g. PubMed  
1026 PMID: 28553457; PubMed Central PMCID: PMC65424465.
- 1027 83. Schmied WH, Elsasser SJ, Uttamapinant C, Chin JW. Efficient multisite unnatural amino acid  
1028 incorporation in mammalian cells via optimized pyrrolysyl tRNA synthetase/tRNA expression and  
1029 engineered eRF1. *J Am Chem Soc*. 2014;136(44):15577-83. doi: 10.1021/ja5069728. PubMed  
1030 PMID: 25350841; PubMed Central PMCID: PMC64333590.
- 1031 84. Kalstrup T, Blunck R. Reinitiation at non-canonical start codons leads to leak expression  
1032 when incorporating unnatural amino acids. *Scientific reports*. 2015;5:11866. Epub 2015/07/15. doi:  
1033 10.1038/srep11866. PubMed PMID: 26153354; PubMed Central PMCID: PMC64648390.

1034
